# Supplementary material for: Could implementation of mifepristone address Canada’s urban–rural abortion access disparity: a mixed-methods implementation study protocol
Source: PubMed Central journal article supplement — BMJ Open. 2019 Apr 20;9(4):e028443. doi: 10.1136/bmjopen-2018-028443 (PMC6500320; doi:10.1136/bmjopen-2018-028443), 2019-04-20
Supplement: bmjopen-2018-028443.draft_revisions.pdf [file bmjopen-2018-028443.draft_revisions.pdf]

# BMJ Open

BMJ Open is committed to open peer review. As part of this commitment we make the peer review history of every article we publish publicly available.

When an article is published we post the peer reviewers' comments and the authors' responses online. We also post the versions of the paper that were used during peer review. These are the versions that the peer review comments apply to.

The versions of the paper that follow are the versions that were submitted during the peer review process. They are not the versions of record or the final published versions. They should not be cited or distributed as the published version of this manuscript.

BMJ Open is an open access journal and the full, final, typeset and author-corrected version of record of the manuscript is available on our site with no access controls, subscription charges or pay-per-view fees (<http://bmjopen.bmj.com>).

If you have any questions on BMJ Open's open peer review process please email [editorial.bmjopen@bmj.com](mailto:editorial.bmjopen@bmj.com)

# BMJ Open

## Could implementation of mifepristone address Canada's urban-rural abortion access disparity? A mixed methods implementation study protocol

|                               |                                                                                                                                                                                                                                                                                                                                                                                                                                                                                                                                                                                                                                                                                                                                                                                                                                                                                                                                          |
|-------------------------------|------------------------------------------------------------------------------------------------------------------------------------------------------------------------------------------------------------------------------------------------------------------------------------------------------------------------------------------------------------------------------------------------------------------------------------------------------------------------------------------------------------------------------------------------------------------------------------------------------------------------------------------------------------------------------------------------------------------------------------------------------------------------------------------------------------------------------------------------------------------------------------------------------------------------------------------|
| Journal:                      | <i>BMJ Open</i>                                                                                                                                                                                                                                                                                                                                                                                                                                                                                                                                                                                                                                                                                                                                                                                                                                                                                                                          |
| Manuscript ID                 | bmjopen-2018-028443                                                                                                                                                                                                                                                                                                                                                                                                                                                                                                                                                                                                                                                                                                                                                                                                                                                                                                                      |
| Article Type:                 | Protocol                                                                                                                                                                                                                                                                                                                                                                                                                                                                                                                                                                                                                                                                                                                                                                                                                                                                                                                                 |
| Date Submitted by the Author: | 10-Dec-2018                                                                                                                                                                                                                                                                                                                                                                                                                                                                                                                                                                                                                                                                                                                                                                                                                                                                                                                              |
| Complete List of Authors:     | Norman, Wendy V.; University of British Columbia, Dept of Family Practice<br>Munro, Sarah; University of British Columbia, Department of Family Practice<br>Brooks, Melissa ; Dalhousie University, Department of Obstetrics and Gynaecology<br>Devane, Courtney ; University of British Columbia, Department of Family Practice<br>Guilbert, Edith; Institut national de sante publique du Quebec<br>Renner, Regina ; University of British Columbia, Department of Obstetrics and Gynaecology<br>Kendall, Tamil ; University of British Columbia, Department of Family Practice<br>Soon, Judith ; University of British Columbia, Faculty of Pharmaceutical Sciences<br>Waddington, Ashley ; Queen's University, Department of Obstetrics and Gynaecology<br>Wagner, Marie-Soleil ; University of Montreal, Department of Obstetrics and Gynaecology<br>Dunn, Sheila; University of Toronto, Department of Family & Community Medicine |
| Keywords:                     | Integrated knowledge translation, Knowledge mobilization, Implementation, Health policy < HEALTH SERVICES ADMINISTRATION & MANAGEMENT, Abortion                                                                                                                                                                                                                                                                                                                                                                                                                                                                                                                                                                                                                                                                                                                                                                                          |
|                               |                                                                                                                                                                                                                                                                                                                                                                                                                                                                                                                                                                                                                                                                                                                                                                                                                                                                                                                                          |

SCHOLARONE™  
Manuscripts

1  
2  
3 1 **Could implementation of mifepristone address Canada's urban-rural abortion access**  
4  
5 2 **disparity? A mixed methods implementation study protocol**  
6  
7  
8 3  
9

10 4 Authors:

11  
12  
13 5 Wendy V. Norman, MD, MHSc, University of British Columbia, Department of Family Practice.

14  
15 6 320-5950 University Boulevard, Vancouver, BC, Canada V6T 1Z3. [wendy.norman@ubc.ca](mailto:wendy.norman@ubc.ca)  
16  
17

18 7 Sarah Munro, PhD, University of British Columbia, Department of Family Practice. 320-5950

19  
20 8 University Boulevard, Vancouver, BC, Canada V6T 1Z3. [Sarah.munro@ubc.ca](mailto:Sarah.munro@ubc.ca)  
21  
22

23 9 Melissa Brooks, MD, Dalhousie University, Department of Obstetrics and Gynaecology.

24  
25 10 5850/5980 University Avenue, P.O. Box 9700, Halifax, Nova Scotia, Canada B3K 6R8.  
26  
27

28 11 [melissa.brooks@dal.ca](mailto:melissa.brooks@dal.ca)  
29

30 12 Courtney Devane, RN, MSN, PhD Candidate, University of British Columbia, Department of

31  
32 13 Family Practice. 320-5950 University Boulevard, Vancouver, BC, Canada V6T 1Z3.  
33  
34

35 14 [courtney.devane@ubc.ca](mailto:courtney.devane@ubc.ca)  
36  
37

38 15 Edith Guilbert, MD, MSc, Université Laval, Department of Obstetrics and Gynaecology. 2325,

39  
40 16 rue de l'Université, Québec (Québec), Canada G1V 0A6. [edith.guilbert@inspq.qc.ca](mailto:edith.guilbert@inspq.qc.ca)  
41

42 17 Regina Renner, MD, MPH, University of British Columbia, Department of Obstetrics and

43  
44 18 Gynaecology. Suite 930, 1125 Howe Street, Vancouver, BC, Canada V6Z 2K8.  
45  
46

47 19 [regina.renner@ubc.ca](mailto:regina.renner@ubc.ca)  
48  
49

50 20 Tamil Kendall, PhD, Perinatal Services BC. West Tower, Suite 350, 555 West 12th Avenue,

51  
52 21 Vancouver, BC, Canada V5Z 3X7. [tamil.kendall@phsa.ca](mailto:tamil.kendall@phsa.ca)  
53

54 22 Judith A. Soon, RPh, PhD, University of British Columbia, Faculty of Pharmaceutical Sciences.

55  
56  
57 23 2405 Wesbrook Mall, Vancouver, BC, Canada V6T 1Z3. [judith.soon@ubc.ca](mailto:judith.soon@ubc.ca)  
58  
59

1 Ashley Waddington, MD, MPA, Queen's University, Department of Obstetrics and Gynaecology.

2 Victory 4, Kingston General Hospital, Kingston, Ontario, Canada K7L 2V7.

3 [ashley.waddington@queensu.ca](mailto:ashley.waddington@queensu.ca)

4 Marie-Soleil Wagner, MD, MSc, University of Montreal, Department of Obstetrics and

5 Gynaecology. 1000, rue Saint-Denis, Montreal, QC, Canada H2X 0C1.

6 [mmsswagner@hotmail.com](mailto:mmsswagner@hotmail.com)

7 Sheila Dunn, MD, MSc, University of Toronto, Department of Family & Community Medicine.

8 76 Grenville St. Toronto, ON, Canada M5S 1B6. [Sheila.Dunn@wchospital.ca](mailto:Sheila.Dunn@wchospital.ca)

9  
10 **\* Corresponding author:**

11 Wendy V. Norman

12 320-5950 University Boulevard, University of British Columbia

13 Vancouver, BC, Canada V6T 31Z3

14 Tel: 604-875-2424 x 4990

15 Fax: 1-866-656-5544

16 [wendy.norman@ubc.ca](mailto:wendy.norman@ubc.ca)

17  
18 **Keywords**

19 Integrated knowledge translation, Knowledge mobilization, Implementation, Health policy,

20 Abortion

21  
22 Word count: 4914

23

**1 ABSTRACT****2 Introduction**

3 In January 2017, mifepristone-induced medical abortion was made available in Canada. In this  
4 study, we will seek to 1) understand facilitators and barriers to the implementation of  
5 mifepristone across Canada, 2) assess the impact of a “community of practice” clinical and  
6 health service support platform, and 3) engage in and assess the impact of integrated  
7 knowledge translation (iKT) activities aimed to improve health policy, systems, and service  
8 delivery issues to enhance patient access to mifepristone.

**9 Methods & Analysis**

10 This prospective mixed-methods implementation study will involve a national sample of  
11 physicians and pharmacists recruited via an online training program, professional networks, and  
12 a purpose-built community of practice website. Surveys that explore constructs related to  
13 Diffusion of Innovation and Godin’s behaviour change frameworks will be conducted at  
14 baseline and at 6 months, and qualitative data will be collected from electronic interactions on  
15 the website. Survey participants and a purposeful sample of decision makers will be invited to  
16 participate in in-depth interviews. Descriptive analyses will be conducted for quantitative data.  
17 Thematic analysis guided by the theoretical frameworks will guide interpretation of qualitative  
18 data. We will conduct and assess iKT activities involving Canada's leading health system and  
19 health professional leaders, including evidence briefs, GIS-maps, face-to-face meetings, and  
20 regular electronic exchanges. Findings will contribute to understanding the mechanisms of iKT  
21 relationships and activities that have a meaningful effect on uptake of evidence into policy and  
22 practice.

23

1  
2  
3 **1 Ethics & Dissemination**  
4

5  
6 2 Ethical approval was received from the University of British Columbia Children's and Women's  
7  
8 3 Hospital Ethics Review Board (H16-01006). Full publication of the work will be sought in an  
9  
10 4 international peer-reviewed journal. Findings will be disseminated to research participants  
11  
12 5 through newsletters and media interviews, and to policy makers through invited evidence  
13  
14 6 briefs, and face to face presentations.  
15  
16  
17  
18  
19

20 **8 ARTICLE SUMMARY**  
21

22 **9 Strengths and limitations of this study**  
23  
24

- 25 10 • This study will provide critical evidence about the effect of the full range of health  
26  
27 11 policy, system, and service determinants on access to medication abortion.  
28  
29  
30 12 • We will employ an integrated knowledge translation approach (iKT), where decision  
31  
32 13 makers and practitioners are actively involved in collecting, analyzing, and interpreting  
33  
34 14 our study data.  
35  
36  
37 15 • We anticipate that our iKT approach of having decision makers on the research team  
38  
39 16 will have the potential to accelerate the implementation of mifepristone in Canada, as  
40  
41 17 decision makers will be more likely to accept and act on our co-produced knowledge,  
42  
43 18 more rapidly mitigate barriers, and improve equitable access to abortion.  
44  
45  
46 19 • Results will be generalizable to other nations that have similar abortion restrictions for  
47  
48 20 medication abortion.  
49  
50  
51  
52  
53  
54  
55  
56  
57  
58  
59  
60

## 1 INTRODUCTION

2 Induced abortion is a common, safe, and legal reproductive health procedure in Canada, with  
3 nearly one in three Canadian women having at least one abortion during their reproductive  
4 years.[1–3] However, access to abortion is not equitable. In 2012, 96% of Canadian abortions  
5 were performed using surgery, through fewer than 100 facilities, mostly located primarily in  
6 Canada's largest cities within 150 km of the US border.[3,4] Historically in Canada, abortion  
7 provision has been included within the scope of practice only for physicians, and in 2012, it was  
8 offered by fewer than 300 doctors.[3,5] Under these conditions, patients living outside of major  
9 cities had to travel inordinate distances to reach service locations, experienced significant wait  
10 times, and faced numerous barriers to equitable access to abortion service.[6,7] Notably, The  
11 United Nations Human Rights Commissioner's November 2016 Report of the *Committee on*  
12 *Elimination of Discrimination Against Women* expressed concern over inequitable abortion  
13 access in Canada and called on the government of Canada to demonstrate improvement.[8]  
14 Canada's federal drug regulator, Health Canada, approved mifepristone, the gold standard for  
15 medical abortion,[5] in July of 2015.[9] Subsequently, mifepristone first became available to  
16 Canadians on January 10<sup>th</sup>, 2017.[10]  
17 Mifepristone was first introduced to the global marketplace in 1988. In other nations the drug  
18 has not been associated with an increase in overall abortion rates, while it has increased the  
19 proportion of medical abortion compared to surgical.[11] Widely differing rates of mifepristone  
20 implementation, particularly in primary care settings, have been noted world-wide among  
21 countries with approval.[11–16] Uptake in the USA was among the slowest: at 10 years after  
22 approval, only 10% of all abortions were provided by mifepristone, compared to 70% in  
23 Scotland and 80% in northern Europe.[11,13,14,16] Variation in health systems, provider

1 training, provider support, drug regulations, and legislated restrictions may account for these  
2 differences. Canada's geographic disparities in access to abortion care, particularly among rural  
3 and remote populations, call for innovative approaches to the implementation of mifepristone  
4 services, including strategies to support primary care providers to initiate and sustain abortion  
5 services. Mifepristone implementation has the potential to address current abortion service  
6 disparities and health access inequities, particularly among disadvantaged populations.  
7 When mifepristone was approved in Canada, Health Canada specified several unique  
8 restrictions that could act as significant barriers to access. Namely, only physicians may  
9 prescribe and dispense mifepristone, and that those who provide mifepristone must be  
10 certified through an accredited online training program.[9,17] Our multidisciplinary research  
11 team theorizes that mifepristone training and practice could be undertaken by a range of  
12 healthcare professionals who are interested in providing mifepristone, including family  
13 physicians, nurse practitioners and midwives. Further we postulate that, based on the above  
14 cited evidence from international settings, mandatory training and certification without  
15 additional practice support will be insufficient to facilitate adoption and distribution of this  
16 innovation in the face of the federal restrictions, particularly among primary healthcare  
17 professionals in rural areas and/or without prior experience providing abortion. We further  
18 hypothesize that the identification and mitigation of implementation barriers and facilitators at  
19 the health policy, system, and service delivery levels, particularly those affecting primary care  
20 providers, could advance mifepristone practice in Canada and improve equitable abortion care  
21 access.

22 Our study is informed by principles of integrated knowledge translation (iKT) [18] and Roger's  
23 Theory of the Diffusion of Innovation [19] in seeking to answer the question: *What are the*



1  
2  
3 1 *factors that influence successful initiation and ongoing provision of medical abortion services*  
4  
5 2 *among health professionals, and how do these relate to health policies, systems, and services,*  
6  
7 *and to abortion services access throughout Canada?*  
8  
9

## 10 4 11 12 13 5 **METHODS**

### 14 15 6 **Aims**

16  
17  
18 7 The aims of this study are:

- 19  
20 8 • To understand health policy, system and service facilitators and barriers to the  
21  
22 9 distribution and implementation of mifepristone abortion practice in primary care.  
23  
24 10 • To assess the impact of a “Community of Practice” platform to detect and support  
25  
26 11 clinical, health service, and system challenges faced by clinicians adopting mifepristone  
27  
28 12 medical abortion practice.  
29  
30 13 • To evaluate continuous iKT with and by health policy, health system, and health services  
31  
32 14 decision makers and health professional organizations to reduce barriers, and optimize  
33  
34 15 facilitators, for mifepristone abortion practice.  
35  
36  
37  
38  
39

40 16 This study protocol is guided by the Standards for Reporting Implementation Studies (StaRI)  
41  
42 17 statement.[20]  
43  
44

### 45 18 46 47 19 **Conceptual Frameworks**

48  
49 20 Our study uses a theoretical framework combining two theories to explain adoption and  
50  
51 21 diffusion of innovations: *Roger’s Theory of the Diffusion of Innovation* and *Godin’s framework*.  
52  
53 22 *Greenhalgh et al.* [19] developed constructs to capture determinants for implementation, as  
54  
55 23 articulated by *Rogers’ Theory of the Diffusion of Innovation*,[21] in health service delivery and  
56  
57  
58  
59

1 health systems (see Figure 1). This comprehensive theoretical model of dissemination and  
2 implementation of health service innovations aims to support research for bridging the gap  
3 between knowledge and practice/policy. The model was developed from a systematic meta-  
4 narrative review of scientific evidence on factors related to implementation.[19] It articulates  
5 key constructs for capturing the complex processes of implementation: characteristics of the  
6 innovation and adopter; methods of diffusion and dissemination (e.g. communication and  
7 influence); system antecedents and readiness; outer context; resource systems and change  
8 agents; and their role in facilitating the implementation process.[19] Cook *et al.* operationalized  
9 these constructs into semi-structured survey and interview questions to allow researchers to  
10 generate evidence on barriers and enablers to implementation.[22]

11  
12 **Figure 1. Determinants of diffusion of innovations in health service delivery organizations,**  
13 **adapted from Greenhalgh *et al.* [19]**

14  
15 Within these constructs we further explore provider uptake and behaviours using *Godin's*  
16 *framework*,[23] integrating the Theory of Planned Behaviour,[24] and Triandis' Theory,[25] to  
17 predict intention and uptake of clinical behaviour. The strongest predictors of behaviour are  
18 intention, belief about capabilities, and frequency of past behaviour. Intention is influenced by  
19 belief about consequences, role identity, moral norm, social influences, and personal  
20 characteristics. This framework has good application to practice in the abortion context, where  
21 role identity, moral norm, and social factors could have strong influence on behaviour.[26]

22  
23 **Design**

1 We designed a prospective mixed methods observational research study on factors that  
2 influence implementation of mifepristone in primary care over the initial two years of practice  
3 in Canada. We hypothesized that healthcare professionals interested in adopting mifepristone  
4 care into their practice would have widely varied professional characteristics, practice locations  
5 and settings, and local or health system supports, and would serve a wide variety of  
6 disadvantaged and vulnerable populations; all of which may influence implementation and  
7 access to care. Our national, interprofessional research team (nursing, medicine, pharmacy,  
8 epidemiology, implementation science, medical sociology, computer science, public health, and  
9 education) is comprised of senior, mid, and early career investigators, national and provincial  
10 policy makers, health care and health professional organizations, clinicians, citizen groups, and  
11 trainees. Our design is flexible and will be adapted in response to health system and policy  
12 changes. This will allow us to collect data in the setting, samples, and contexts that may provide  
13 the richest information to answer our research questions.

### 15 **Health System Intervention**

16 Mifepristone is marketed, in combination with misoprostol in Canada, as Mifegymiso®, for the  
17 indication of early medical abortion (one mifepristone 200 mg tablet and four misoprostol 200  
18 mcg tablets). Mifepristone is used in more than 60 countries worldwide, is on the World Health  
19 Organization list of essential medicines,[27] and has an excellent safety and effectiveness  
20 profile as illustrated by administration to millions of women.[28–30]  
21 Mifepristone provided in primary care settings is an innovative health service delivery model for  
22 medical abortion. Until now, high-income country drug regulators have placed a range of  
23 unique restrictions on the distribution and administration of mifepristone,[31,32] which has

1 largely limited provision of mifepristone to abortion providers in existing urban sexual and  
 2 reproductive specific health facilities, that generally provide a high volume of surgical abortion  
 3 services. In Australia, for instance, mifepristone by prescription that could be filled in a  
 4 pharmacy was approved in 2012, but restrictions including provider and pharmacist training  
 5 and certification limited initial uptake.[33] Similar restrictions were approved in Canada as part  
 6 of the initial 2015 drug approval [9,17] (see Table 1).

8 **Table 1. Canadian Restrictions for Prescribing and Dispensing Mifepristone, July 2015 [9,17]**

|                                                                                   |
|-----------------------------------------------------------------------------------|
| Mandatory training for prescribers and pharmacists                                |
| Mandatory registration of prescribers and pharmacists with the manufacturer       |
| Physician-only prescribing                                                        |
| Physician-only dispensing direct to the patient                                   |
| Mandatory use of a manufacturer-provided consent form to be signed by the patient |
| Physician's observation of mifepristone ingestion                                 |

9  
 10 Nonetheless, mifepristone abortion delivered in primary care settings by physicians and other  
 11 skilled providers has been shown to be safe and effective.[12–14,28–30,34–36] In this context,  
 12 we will seek to identify, initiate, and evaluate two implementation strategies that aim to  
 13 overcome clinical, health service, and system challenges faced by clinicians adopting  
 14 mifepristone medical abortion practice, particularly in primary care settings.

15  
 16 **Implementation Strategy**

17 *A. Community of Practice platform*

1  
2  
3 1 The central iKT strategy for this study is the collaborative interdisciplinary community of  
4  
5 2 practice – with the objective of sharing real-time clinical best practices, disseminating  
6  
7 3 information, advocating for and sharing policy changes to support timely and equitable access  
8  
9 4 to mifepristone medical abortion by bringing together health providers, policy, and system  
10  
11 5 partners and our team of investigators and knowledge users. As Wenger explains,  
12  
13 6 “communities of practice are groups of people who share a concern, a set of problems, or a  
14  
15 7 passion about a topic, and who deepen their knowledge and expertise in this area by  
16  
17 8 interacting on an ongoing basis.”[37] The principle underlying communities of practice is that  
18  
19 9 practitioners advance their skills and knowledge both on the job and off work through *social*  
20  
21 10 *relationships*, rather than in classroom settings.[38] Social learning through a social structure  
22  
23 11 facilitates learning a practice through interactions, relationships, and sharing of resources and  
24  
25 12 solutions to build skills and knowledge. The rationale for including a community of practice  
26  
27 13 strategy was derived from the international literature on mifepristone practice in other high-  
28  
29 14 income nations, and was reinforced by findings from focus group research involving Canadian  
30  
31 15 physicians in which we developed and pilot tested the survey for this present study.[39,40]  
32  
33 16 We created a community of practice platform for the present study: the Canadian Abortion  
34  
35 17 Providers Support-Communauté de pratique canadienne sur l’avortement (CAPS-CPCA), an  
36  
37 18 internet accessible web site. It is designed to encourage multi-directional interaction of  
38  
39 19 healthcare professionals engaging in mifepristone practice with the experts and researchers  
40  
41 20 and will promote sharing best practice resources and facilitators. Interactive pages (“Ask an  
42  
43 21 Expert” and “Share a Case”) will promote asynchronized dialogue while resource pages  
44  
45 22 (“What’s happening in your province?”, “Locate a Pharmacy,” and “Helpful Resources”) will  
46  
47 23 provide practical, local knowledge for members to apply in their individual practices. Members  
48  
49  
50  
51  
52  
53  
54  
55  
56  
57  
58  
59

1 will be provided news updates on topics relevant to mifepristone practice, such as practice  
2 tools, billing codes, regulation changes, and universal coverage.

3 *B. Integrated knowledge translation activities*

4 We follow the Canadian Institutes of Health Research definition of iKT, which describes it as “an  
5 approach to doing research that applies the principles of knowledge translation to the entire  
6 research process. The central premise of iKT is that involving knowledge users as equal partners  
7 alongside researchers will lead to research that is more relevant to, and more likely to be useful  
8 to, the knowledge users.”[18] We anticipate that our iKT approach will more rapidly mitigate  
9 barriers and improve equitable access to abortion, with the assumption that stakeholders will  
10 be more likely to accept and act on co-produced knowledge.[41,42] Using iKT processes to  
11 achieve particular objectives focuses researchers and stakeholders on the same page to create  
12 shared meaning, identify facilitators and barriers to the process of evidence implementation,  
13 and co-create empirical knowledge to support health service planning. As a result, the  
14 partnership process itself is instrumental in implementing sustainable change.[43] The effect of  
15 iKT activities on research outcomes such as practice and policy change is still unclear, largely  
16 due to inconsistent description, evaluation, and reporting in most studies.[44] However, there  
17 is emerging evidence from Canada and the UK that iKT may lead to increased capacity to use  
18 research among knowledge users, greater relevance and usefulness of research evidence to  
19 knowledge users, increased use of research in decision-making, and improved patient and  
20 health system outcomes.[45]

21 In the context of this study our iKT activities are diverse, responsive, and tailored to the needs  
22 and contexts of stakeholders. These activities include but are not limited to: invited evidence  
23 briefs, face to face meetings, media interviews, minutes documenting interactions within

1  
2  
3 1 monthly multidisciplinary team video-conferenced meetings and at annual national  
4  
5 2 collaboration meetings. Face-to-face interaction will optimize relationships, apprise knowledge  
6  
7 3 users of progress, and ensure the flow of ideas. Both clinician and policy maker knowledge  
8  
9 4 users will be welcomed to join our monthly meetings, to contribute actively to the evaluation  
10  
11 5 and interpretation of data collected each month, and to plan to address identified barriers and  
12  
13 6 facilitators in real time. Knowledge users may identify colleagues for face-to-face meetings  
14  
15 7 relevant to specific phases of the project. Our meeting agendas will address topics from policy  
16  
17 8 development, to education input, to practice. Our investigators and knowledge users will be  
18  
19 9 invited to convey results to other knowledge user organizations, such as: health professional  
20  
21 10 development at national, provincial, and regional health professional meetings; post-secondary  
22  
23 11 institution faculty providing health practitioner education programs (informing pre-licensure  
24  
25 12 training); provincial colleges of health professionals (informing licensure bodies); and  
26  
27 13 community sexual health organizations across Canada. Quarterly briefs will engage team  
28  
29 14 knowledge users, health professional participants, community organization partners, and  
30  
31 15 appropriate colleagues and collaborators identified by them, to encourage informed updated  
32  
33 16 approaches.  
34  
35  
36  
37  
38  
39  
40  
41  
42  
43  
44

## 45 **Patient and Public Involvement**

46  
47 19 Patient partners were involved in co-designing the research questions and outcome measures.  
48  
49 20 Patients and representatives from community-based sexual health organizations across Canada  
50  
51 21 were engaged through a face-to-face symposium in October 2015 and participated in regular  
52  
53 22 monthly video-conference meetings. Through deliberation and dialogue, they discussed with  
54  
55 23 the research team their perspectives on priority areas of study, and recruitment strategies for  
56  
57  
58  
59

1 participants in rural and remote communities. As potential participants did not include patients  
2 or members of the public, only health care professionals were asked to assess the burden of the  
3 intervention and the time required to participate in research. Representatives from community-  
4 based sexual health organizations reviewed and provided feedback on our finalized research  
5 questions and design during the monthly videoconferences. They will be involved in  
6 disseminating study results to the public through infographics shared in presentations and by  
7 email with their networks.

## 9 **Setting and Participants**

10 This national study will explore mifepristone medical abortion in the context of primary care  
11 settings. In Canada, 85% of Canadians have a regular medical doctor [46] and provision of  
12 abortion by primary care providers is highly acceptable – the majority of surgical abortion  
13 providers are family physicians.[47] For the purposes of this study we define primary care  
14 settings as any service delivery environment where a prescriber may provide primary care,  
15 including hospitals, abortion facilities, health centres, and private physician offices. Consistent  
16 with the initial Health Canada approval of the medication, we defined prescriber as a certified  
17 physician.

### 18 *Group A: Healthcare Professionals engaged with mifepristone practice:*

19 Survey and interview enrollment for part 1 of the study is offered to all certified prescribers and  
20 pharmacists who intend to begin practice with mifepristone within the first year they are  
21 eligible to do so. As our past studies among abortion providers have recruited ~90% of eligible  
22 participants,[3,46–48] we anticipate the cohort will be highly representative. We estimate up to  
23 1,000 healthcare professionals would engage in mifepristone practice within the first year.



1  
2  
3 1 *Group B: Community of practice platform*

4  
5  
6 2 The community of practice website will engage a wide range of interdisciplinary licensed  
7  
8 3 healthcare professionals who are interested in providing mifepristone care, including certified  
9  
10 4 prescribers and pharmacists. We will capture data from all members who enroll in the platform.

11  
12  
13 5 *Group C: Health policy, system, and services decision makers and non-mifepristone providing*  
14  
15 6 *health care professionals:*

16  
17  
18 7 We will recruit influential decision makers across Canada who have the potential to impact  
19  
20 8 health policy, system, and service factors found to be important determinants of  
21  
22 9 implementation, as they are identified throughout the study. We will also engage health care  
23  
24 10 professionals who do not choose to provide mifepristone, particularly if they are providing  
25  
26 11 similar women's health services, using key informant interviews or focus groups. These non-  
27  
28 12 mifepristone providing health care professionals represent a population with an important  
29  
30 13 viewpoint to assist us to understand barriers.

31  
32  
33  
34  
35 14 *Group D: Knowledge users engaged with iKT activities*

36  
37 15 Knowledge users have been involved in the research process from idea inception (questions  
38  
39 16 and design elements posed by our knowledge user collaborators) to the development of this  
40  
41 17 study to delineate facilitators and inform changes to the health system to facilitate  
42  
43 18 implementation. They include health policy and practice decision-makers at the regional,  
44  
45 19 provincial, and federal levels. We will invite these individuals and organizations to participate in  
46  
47 20 data collection for the evaluation of our iKT activities.  
48  
49  
50

51  
52  
53  
54 22 **Outcomes**

1 We will evaluate the effect of our mixed methods, iKT implementation study on health system  
2 and policy decision-making, regulatory changes, and upon uptake of mifepristone. We will  
3 assess the uptake of mifepristone medical abortion by measuring the proportion of certified  
4 physicians and pharmacists (per professional category) who are providing mifepristone care 1-  
5 year post enrollment, at least once in the most recent 3 months in which they were in their  
6 usual practice. In addition, we will explore: 1) the number of communities or populations that  
7 have access to abortion compared to baseline; 2) the proportion of certified healthcare  
8 professionals providing mifepristone at 6 months post enrollment (by professional category and  
9 by location, e.g. urban vs rural, province); and 3) the volume of service provision at 1-year and  
10 correlates, particularly compared to baseline distribution of abortion service providers and  
11 facilities.

12 Additionally, based on our mixed methods analysis, we will develop an empirically-driven  
13 framework of diffusion of innovation in a health system, that builds on and extends Greenhagh  
14 *et al.*'s theory.

15 We will also be flexible to identify and collect outcomes of interest to our policy maker  
16 stakeholders, as part of our ongoing iKT approach.

17

## 18 **Data Collection**

19 Our project incorporates five key inter-related evaluation components (Figure 2):

- 20 1. Continuous iKT activity interactions with key knowledge users and decision makers in  
21 health policy, health system, health professional organization and regulation, and health  
22 services delivery contexts; and

- 1
- 2
- 3 1 2. Evaluation of iKT interactions with knowledge users and decision makers, and relation to
- 4
- 5
- 6 2 any associated health policy, system, and service changes during the project.
- 7
- 8 3 3. Surveys and interviews among healthcare professionals who are interested in providing
- 9
- 10 4 mifepristone care;
- 11
- 12
- 13 5 4. Quantitative and qualitative data collected from interactions on a community of
- 14
- 15 6 practice support platform for healthcare professionals, the Canadian Abortion Providers
- 16
- 17 7 Support- Communauté de pratique Canadienne sur l'avortement (CAPS-CPCA) platform;
- 18
- 19
- 20 8 5. Interviews with key health system and services decision makers and informants, and
- 21
- 22 9 with healthcare professionals who are engaged with women's health but choose not to
- 23
- 24 10 provide mifepristone care;
- 25
- 26
- 27
- 28 11
- 29

30 12 **Figure 2. Canada's Mifepristone Implementation Study, components of study design**

31

32

33

34

35 14 **1. Surveys:** We will distribute questionnaires among *Healthcare Professionals engaged with*

36

37 15 *mifepristone practice* (Group A) to measure factors related to adoption of mifepristone

38

39

40 16 abortion into practice [50] *and* to explore constructs for diffusion of innovation. As appropriate,

41

42 17 components of either or both sections will be administered at baseline, 6 and 12 months.

43

44

45 18 Participant demographics will be collected at baseline.

46

47 19 **Section 1** Component surveys for the constructs of Diffusion of Innovation will be

48

49

50 20 administered. Constructs that are expected to change over time will be examined at

51

52 21 baseline and later time points (e.g., task issues, skills); constructs relating to factors

53

54 22 unknown at baseline (e.g., characteristics of diffusion) will be collected at 12 months.

55

56

57

58

59

60

1                   **Section 2** A 12-item questionnaire adapted from Légaré's validated instrument [51]

2                   based on the Godin framework will be administered at baseline, 6, and 12 months.

3 The survey instruments used in this study were developed and tested following methods  
4 described elsewhere. [51,52] Additionally, we conducted a rigorous process to develop and test  
5 the surveys used to measure implementation of mifepristone.[40] The process for adapting and  
6 pilot testing the surveys for the present study is described in a forthcoming publication.

7  
8 **2. Interviews:** Semi-structured interviews will be conducted with a purposeful sample of the  
9 certified physicians and pharmacists of Group A, selected to represent diversity of:  
10 demographic characteristics (e.g. gender, age, profession); factors related to adoption and  
11 diffusion of mifepristone practice (such as previous abortion practice and rural vs. urban  
12 location); and positive and negative experiences of abortion practice within 1-year post-training  
13 (to investigate the factors that affect implementation). Recruitment will be facilitated via the  
14 online survey. All healthcare professionals enrolled in the broader study will be asked, upon  
15 completing the survey, if they would like to be contacted for a follow-up interview. Interested  
16 and eligible physician and pharmacist certificants will be contacted to arrange a follow-up  
17 interview in person or by phone. No interview participants will be recruited via Group B, the  
18 Community of Practice, although certificants from Group A may also be members of the  
19 Community.

20 Health policy, system, and services decision makers and non-mifepristone providing health care  
21 professionals (Group C) and stakeholders involved in our iKT activities (Group D) will be  
22 purposefully sampled based on pre-identified factors [49,53] (e.g. profession, previous  
23 experience in abortion policy development or service provision, number of years as a

1  
2  
3 1 knowledge user with the research team) and invited to participate in an interview. Group C  
4  
5 2 participants will be invited via third party recruitment with the assistance of the study's  
6  
7  
8 3 knowledge user partners. Group D participants will be invited by email to participate in an  
9  
10 4 interview with our research team's implementation scientist. As categories emerge from  
11  
12 5 analysis of transcripts, theoretical sampling will be conducted to pursue emerging themes  
13  
14 6 related to policy, system, and/or service factors that influence implementation.  
15  
16  
17 7 Interview questions will be theoretically informed by Diffusion of Innovation constructs, and  
18  
19 8 Cook *et al.*'s interview guide [22] will be pilot tested with a panel of researchers and clinicians  
20  
21 9 prior to data collection. Interviews will be conducted until we achieve saturation in our data  
22  
23 10 collection, sampling, and analysis.[54] In our data collection we will seek "informational  
24  
25 11 redundancy" [55] (new data repeat what was expressed in previous data). We will recruit  
26  
27 12 participants until no new themes or codes are identified in analysis and we have sufficient data  
28  
29 13 to illustrate the core constructs of Diffusion of Innovation theory. We will also seek to recruit  
30  
31 14 participants until our data sufficiently represents a range of the pre-identified factors from our  
32  
33 15 purposeful sampling strategies.  
34  
35  
36  
37  
38  
39  
40  
41

42 17 **3. Data Collection through the Community of Practice:** Data from the community of practice  
43  
44 18 platform will include reports of barriers and facilitators; responses to iterative 1-question polls  
45  
46 19 (based on surveys); questions to experts and participant usage statistics. Relationships within  
47  
48 20 the community of practice and with the research team will enable identification of challenges,  
49  
50 21 which will be shared with knowledge users via the iKT activities listed below.  
51  
52  
53  
54  
55  
56

#### 57 23 **4. Evaluation of Integrated Knowledge Translation**

58  
59  
60

1 To capture and understand the effectiveness of iKT strategies we will document our activities  
2 using the Workgroup for Intervention Development and Evaluation Research (WIDER) reporting  
3 checklist [56] as recommended by Gagliardi et al.[44] Checklist constructs include: the goal of  
4 the activity and iKT partnership, mode of delivery, duration, frequency, participants, and  
5 personnel. We will also document funding source, who initiated the activity, and the theory  
6 underpinning the activity. Semi-structured interviews with stakeholders, interactions on the  
7 Community of Practice platform, and health system, policy, and service changes occurring in  
8 real time from our correspondence with knowledge users and decision makers will help us  
9 document the effect of our iKT strategies. As described above, these activities will be diverse  
10 and responsive to our knowledge user audiences and may include invited evidence briefs,  
11 quarterly briefs, face to face meetings, email and phone communication, media interviews,  
12 newsletters, and minutes of monthly videoconferences.

13

## 14 **ANALYSIS**

### 15 **1. Quantitative Data**

16 Survey responses will be summarized descriptively over the entire sample. Stratified analysis  
17 will be performed for key determinants (i.e., Federal, Provincial, or Local according to the  
18 issue). For provider characteristics we will collect data on age, gender, rural vs urban setting,  
19 professional role (overall and by specialty), previous abortion provision, and independent  
20 practice vs working in a setting with two or more abortion providers. In light of Quebec's well-  
21 developed support for rural and remote providers,[48,57] we will perform a two-way  
22 stratification by a) Quebec vs the rest of Canada and b) rural/urban status. Additionally,  
23 location data will be collected on all participants to inform geo-mapping analyses on the

1  
2  
3 1 emergence and diffusion of mifepristone practice (and the sub-groups by practitioner and with  
4  
5  
6 2 relation to provincial, national, or regional policies, systems, and service structures) throughout  
7  
8 3 Canada. We will analyze interactions of factors using multivariable logistic regression for binary  
9  
10 4 (e.g. provision of mifepristone) and ordinal (e.g. barriers and facilitators) outcomes, and linear  
11  
12  
13 5 multiple regression for volume of service. Emerging results will be used to inform iKT  
14  
15  
16 6 interactions throughout the project.

17  
18 7 Following Morse's guidance, our mixed methods design is quantitatively driven with a  
19  
20 8 simultaneous qualitative component.[58] Our survey and CAPS analysis will inform the  
21  
22  
23 9 development of probing questions to ask during interviews. Analysis will be simultaneous using  
24  
25 10 constant comparison methods; qualitative results will be used to enhance description of  
26  
27  
28 11 quantitative results and to corroborate knowledge from our different data sources to clarify key  
29  
30 12 barriers and facilitators.

## 31 32 33 34 35 14 **2. Qualitative Data**

36  
37 15 Semi-structured interviews, open-ended survey questions, and CAPS website posted  
38  
39  
40 16 discussions will be subjected to thematic analysis [59] by two qualitatively-trained  
41  
42  
43 17 implementation scientists following confidential transcription. Analysis of qualitative data will  
44  
45 18 involve these iterative, concurrent steps:

- 46  
47 19 1) Developing a codebook by identifying contextual codes related to the research  
48  
49  
50 20 objective (identified inductively from the participant data). The two researchers will  
51  
52 21 first code a sample of transcripts independently and compare their results to ensure  
53  
54  
55 22 accurate interpretation of the data. Discrepancies will be resolved through  
56  
57 23 discussion with a third researcher.

1  
2  
3 1 2) Identifying individual, organizational, and system processes (including patterns,  
4  
5  
6 2 relationships, and interactions) between the codes.

7  
8 3 3) Organizing the processes into a theoretical framework informed by Diffusion of  
9  
10 4 Innovation constructs. Relevant domains for implementation will be identified  
11  
12 5 through research team discussion and consensus.

13  
14  
15 6 4) Writing the analysis into a descriptive, explanatory narrative that illuminates the  
16  
17 7 barriers and facilitators to implementation of mifepristone abortion practice.

18  
19  
20 8 We will test and extend the theory of Diffusion of Innovation. We will consider the frequency of  
21  
22 9 constructs across the data, presence of conflicting constructs, and perceived relevance of the  
23  
24 10 constructs on implementation behaviour. Emerging results will be used to inform iKT  
25  
26 11 interactions throughout the project to identify and mitigate addressable barriers.  
27  
28  
29

### 30 12 31 32 13 **3. Analysis of Integrated Knowledge Translation Activities Data**

33  
34  
35 14 We will analyse the iKT activity and outcome data, evaluating alignment with theoretical model  
36  
37 15 constructs and addressable barriers identified through the research activities. Qualitative  
38  
39 16 thematic analysis [59] of stakeholder interviews will explore health system and policy factors  
40  
41 17 that influence implementation at regional, provincial, and federal levels, as well as the impact  
42  
43 18 of iKT activities on implementation of mifepristone in primary care. As our additional iKT  
44  
45 19 strategies will be emergent, dynamic, and chosen in response to knowledge user and  
46  
47 20 stakeholder need, we will also measure the impact of additional iKT strategies using  
48  
49 21 appropriate methods and outcomes, selection of which will be guided by the Canadian  
50  
51 22 Academy of Health Sciences Impact Framework.[60] All interactions collected will be compared  
52  
53 23 with any subsequent positive, negative, or null changes to health system factors that influence  
54  
55  
56  
57  
58  
59



1  
2  
3 1 implementation of mifepristone. The mechanisms related to any iKT activity will be delineated  
4  
5 2 to assign scaled values for: the impetus (i.e., knowledge user, researcher, media/public); the  
6  
7  
8 3 activity; the participants (categorized as per stakeholder groups); results; and an assignment of  
9  
10 4 an impact score for the effectiveness of the activity to contribute to changes in health policy,  
11  
12  
13 5 system or service delivery advancing mifepristone care.  
14

## 15 6 16 17 18 7 **ETHICS AND DISSEMINATION**

19  
20 8 Ethical approval was obtained from the University of British Columbia Children's and Women's  
21  
22  
23 9 Hospital Research Ethics Review Board (H16-01006) prior to enrollment of participants. All  
24  
25 10 participants in this study will participate in full informed consent. For survey participants,  
26  
27  
28 11 completion and submission of the survey will constitute implied consent; for interview  
29  
30 12 participants, a signed consent form will be required prior to participation.  
31  
32  
33  
34

### 35 14 **Dissemination plan**

36  
37 15 The study commenced on January 1, 2017 and its expected completion date is January 1, 2020.  
38  
39  
40 16 Full publication of the work will be sought in an international peer-reviewed journal. Findings  
41  
42  
43 17 will be disseminated to research participants through newsletters and media interviews, and to  
44  
45 18 policy makers through invited evidence briefs, and face to face presentations.  
46

## 47 19 48 49 20 **DISCUSSION**

50  
51  
52 21 Knowledge and system improvements generated by this project have the potential to increase  
53  
54 22 the proportion of all abortions that are provided medically. In turn, this could:

- 55  
56  
57 23 • Reduce need and systems costs for surgical abortion;

- 1 • Increase delivery of services closer to home, reducing travel and wait times;
- 2 • Increase delivery of services by the primary care provider, decreasing the need for
- 3 referrals;
- 4 • Increase abortion safety, as medical abortion can be provided at the earliest and safest
- 5 stages of pregnancy;
- 6 • Increase confidentiality and reduce the need for patients and health care providers to
- 7 face interactions with protesters;
- 8 • Benefit hospitals by relieving pressure on operating room time and wait lists, while
- 9 reducing stigma reported by abortion providers working in operating room settings.

10  
11 The proposed timely research, undertaken by our well-established cross-sectoral national  
12 network, the Contraception & Abortion Research Team-Groupe de recherche sur l'avortement  
13 et la contraception (CART-GRAC),[53,61,62] will identify the determinants of uptake of medical  
14 abortion as this health service innovation is implemented in Canada. We aim to understand,  
15 and in real time to address, barriers and facilitators to adoption of this new clinical practice.  
16 Knowledge about the effect of the full range of health policy, system and service determinants  
17 on access to mifepristone abortion is needed to realize the potential to increase equitable, safe,  
18 confidential abortion care closer to home for women throughout Canada. Findings also will  
19 contribute to understanding the mechanisms of iKT relationships and activities that have a  
20 meaningful effect on uptake of evidence into policy and practice.

21

1  
2  
3 1 **Acknowledgements:** Thank-you to Jennifer Blake, Rollin Brant, Stirling Bryan, Dustin Costescu,  
4  
5  
6 2 Cheryl Davies, Philip Emberley, Janusz Kaczorowski, Dorothy Shaw, and Eleni Stroulia for  
7  
8 3 providing their expert and professional feedback in preparing this study.  
9  
10  
11 4

## 12 13 **FULL REFERENCES**

- 14  
15 6 1. Norman WV. Induced abortion in Canada 1974-2005: trends over the first generation with  
16  
17 7 legal access. *Contraception*. 2012 Feb;85(2):185–91.  
18  
19  
20  
21 8 2. Canadian Institute for Health Information. Induced abortions performed in Canada in 2015.  
22  
23 9 Canadian Institutes of Health Information. 2017. <http://www.cihi.ca/>. Accessed 30 Mar  
24  
25 10 2017  
26  
27  
28  
29 11 3. Norman WV, Guilbert ER, Okpaleke C, Hayden AS, Steven Lichtenberg E, Paul M, et al.  
30  
31 12 Abortion health services in Canada. *Can Fam Physician*. 2016 Apr;62(4):e209–17.  
32  
33  
34 13 4. Kaposy C. Improving abortion access in Canada. *Health Care Anal*. 2010 Mar;18(1):17–34.  
35  
36  
37  
38 14 5. Dunn S, Cook R. Medical abortion in Canada: behind the times. *CMAJ*. 2014 Jan  
39  
40 15 7;186(1):13–4.  
41  
42  
43 16 6. Sethna C, Doull M. Spatial disparities and travel to freestanding abortion clinics in Canada.  
44  
45 17 *Women's Studies International Forum*. 2013 May 1;38:52–62.  
46  
47  
48  
49 18 7. Sethna C, Doull M. Far from home? A pilot study tracking women's journeys to a Canadian  
50  
51 19 abortion clinic. *J Obstet Gynaecol Can*. 2007 Aug;29(8):640–7.  
52  
53  
54 20 8. United Nations Office of the High Commissioner on Human Rights. Convention on the  
55  
56 21 Elimination of All forms of Discrimination against Women, Concluding observations on the

- 1  
2  
3 1 combined eighth and ninth periodic reports of Canada. Committee on the Elimination of  
4  
5 2 Discrimination against Women . 2016 Nov.  
6  
7  
8 3 <http://www.ohchr.org/EN/HRBodies/CEDAW/Pages/CEDAWIndex.aspx>. Accessed 4 May  
9  
10 4 2018.  
11  
12  
13 5 9. Health Canada. Regulatory decision summary: MIFEGYMISO. Health Canada. 2015.  
14  
15 6 <http://www.hc-sc.gc.ca/>. Accessed 4 May 2018.  
16  
17  
18 7 10. Health Canada. Health Canada Drug Product Database. Health Canada. 2015.  
19  
20 8 <http://www.hc-sc.gc.ca/dhp-mps/prodpharma/databasdon/index-eng.php>. Accessed 4 May  
21  
22 9 2018  
23  
24  
25 10 11. Jones RK, Henshaw SK. Mifepristone for early medical abortion: experiences in France,  
26  
27 11 Great Britain and Sweden. *Perspect Sex Reprod Health*. 2002 Jun;34(3):154–61.  
28  
29  
30 12 12. Bartlett LA, Berg CJ, Shulman HB, Zane SB, Green CA, Whitehead S, et al. Risk factors  
31  
32 13 for legal induced abortion-related mortality in the United States. *Obstet Gynecol*. 2004  
33  
34 14 Apr;103(4):729–37.  
35  
36  
37 15 13. Oppeggaard KS, Qvigstad E, Fiala C, Heikinheimo O, Benson L, Gemzell-Danielsson K.  
38  
39 16 Clinical follow-up compared with self-assessment of outcome after medical abortion: a  
40  
41 17 multicentre, non-inferiority, randomised, controlled trial. *Lancet*. 2015 Feb  
42  
43 18 21;385(9969):698–704.  
44  
45  
46 19 14. Løkeland M, Iversen OE, Engeland A, Økland I, Bjørge L. Medical abortion with  
47  
48 20 mifepristone and home administration of misoprostol up to 63 days' gestation. *Acta Obstet*  
49  
50 21 *Gynecol Scand*. 2014 Jul;93(7):647–53.  
51  
52  
53  
54  
55  
56  
57  
58  
59  
60

- 1 15. Baird B. Medical abortion in Australia: a short history. *Reprod Health Matters*. 2015  
2  
3  
4  
5 2  
6 Nov;23(46):169–76.  
7
- 8 16. Templeton A, Grimes DA. Clinical practice. A request for abortion. *N Engl J Med*. 2011  
9  
10  
11 4  
12 Dec 8;365(23):2198–204.  
13
- 14 17. Health Canada. MIFEGYMISO (mifepristone and misoprostol tablets) - Canadian  
15  
16  
17 6  
18 Distribution and Administration Program. Government of Canada. 2017.  
19 7  
20 <http://healthycanadians.gc.ca/recall-alert-rappel-avis/hc-sc/2017/63330a-eng.php>. Accessed  
21 8  
22 4 May 2018  
23
- 24 18. Canadian Institutes of Health Research. Guide to knowledge translation planning at CIHR:  
25  
26  
27 10  
28 integrated and end-of-grant approaches. Canadian Institutes of Health Research; 2012.  
29 11  
30 <http://www.cihr-irsc.gc.ca/e/45321.html>. Accessed 4 May 2018.  
31
- 32 19. Greenhalgh T, Robert G, Macfarlane F, Bate P, Kyriakidou O. Diffusion of Innovations in  
33  
34  
35 13  
36 Service Organizations: Systematic Review and Recommendations. *Milbank Quarterly*.  
37 14  
38 2004 Dec 1;82:581–629.  
39
- 40 20. Pinnock H, Barwick M, Carpenter CR, Eldridge S, Grandes G, Griffiths CJ, et al. Standards  
41  
42  
43 16  
44 for Reporting Implementation Studies (StaRI) Statement. *BMJ*. 2017 Mar 6;356:i6795.  
45
- 46 21. Rogers EM. *Diffusion of Innovation*. 5th ed. New York, NY, US: Simon Schuster; 2003.  
47  
48
- 49 22. Cook JM, O'Donnell C, Dinnen S, Coyne JC, Ruzek JI, Schnurr PP. Measurement of a  
50  
51  
52 19  
53 model of implementation for health care: toward a testable theory. *Implement Sci*. 2012 Jul  
54 20  
55 3;7(1):59.  
56  
57  
58  
59

- 1 23. Godin G, Bélanger-Gravel A, Eccles M, Grimshaw J. Healthcare professionals' intentions  
2 and behaviours: a systematic review of studies based on social cognitive theories.  
3 Implement Sci. 2008 Jul 16;3:36.
- 4 24. Ajzen I. The theory of planned behavior. Organizational Behavior and Human Decision  
5 Processes. 1991 Dec 1;50(2):179–211.
- 6 25. Triandis HC. Values, attitudes, and interpersonal behavior. Nebraska Symposium on  
7 Motivation. 1979;27:195–259.
- 8 26. Aiyer AN, Ruiz G, Steinman A, Ho GYF. Influence of physician attitudes on willingness to  
9 perform abortion. Obstetrics & Gynecology. 1999 Apr 1;93(4):576–80.
- 10 27. World Health Organization. WHO Model List of Essential Medicine [Internet]. 2017 Mar.  
11 Report No.: 20th edition.  
12 <http://www.who.int/medicines/publications/essentialmedicines/en/>. Accessed 4 May 2018.
- 13 28. Kulier R, Gülmezoglu AM, Hofmeyr GJ, Cheng LN, Campana A. Medical methods for first  
14 trimester abortion. Cochrane Database Syst Rev. 2004;(2):CD002855.
- 15 29. Kapp N, Whyte P, Tang J, Jackson E, Brahmī D. A review of evidence for safe abortion  
16 care. Contraception. 2013 Sep;88(3):350–63.
- 17 30. Barnard S, Kim C, Park MH, Ngo TD. Doctors or mid-level providers for abortion.  
18 Cochrane Database Syst Rev. 2015 Jul 27;(7):CD011242.
- 19 31. Finer L, Fine JB. Abortion Law Around the World: Progress and Pushback. Am J Public  
20 Health. 2013 Apr;103(4):585–9.

- 1  
2  
3 1 32. Mifeprex REMS Study Group. Sixteen Years of Overregulation: Time to Unburden  
4  
5 2 Mifeprex. *New England Journal of Medicine*. 2017 Feb 23;376(8):790–4.  
6  
7  
8  
9 3 33. Grossman D, Goldstone P. Mifepristone by prescription: a dream in the United States but  
10  
11 4 reality in Australia. *Contraception*. 2015 Sep;92(3):186–9.  
12  
13  
14 5 34. White K, Carroll E, Grossman D. Complications from first-trimester aspiration abortion: a  
15  
16 6 systematic review of the literature. *Contraception*. 2015 Nov;92(5):422–38.  
17  
18  
19  
20 7 35. Winikoff B, Westhoff C. Fifteen years: looking back and looking forward. *Contraception*.  
21  
22 8 2015 Sep;92(3):177–8.  
23  
24  
25 9 36. Kopp Kallner H, Gomperts R, Salomonsson E, Johansson M, Marions L, Gemzell-  
26  
27 10 Danielsson K. The efficacy, safety and acceptability of medical termination of pregnancy  
28  
29 11 provided by standard care by doctors or by nurse-midwives: a randomised controlled  
30  
31 12 equivalence trial. *BJOG*. 2015 Mar;122(4):510–7.  
32  
33  
34  
35 13 37. Wenger E, McDermott R, Snyder WM. *Cultivating communities of practice*. Boston:  
36  
37 14 Harvard Business School Publishing; 2002.  
38  
39  
40  
41 15 38. Li LC, Grimshaw JM, Nielsen C, Judd M, Coyte PC, Graham ID. Evolution of Wenger's  
42  
43 16 concept of community of practice. *Implement Sci*. 2009 Mar 1;4:11.  
44  
45  
46  
47 17 39. Newton D, Bayly C, McNamee K, Bismark M, Hardiman A, Webster A, et al. '...a one  
48  
49 18 stop shop in their own community': Medical abortion and the role of general practice. *Aust*  
50  
51 19 *N Z J Obstet Gynaecol*. 2016 Jul 1;n/a-n/a.  
52  
53  
54  
55  
56  
57  
58  
59

- 1  
2  
3 1 40. Devane C, Renner R, Munro S, Norman WV. Implementation of Mifepristone in Canadian  
4  
5 2 Medical Abortion Care: Pilot and Feasibility Testing of a Survey to Assess Facilitators and  
6  
7 3 Barriers. Vancouver, BC: Contraception and Abortion Team; 2017 Oct.  
8  
9  
10  
11 4 41. Kothari A, Armstrong R. Community-based knowledge translation: unexplored  
12  
13 5 opportunities. *Implement Sci.* 2011 Jun 6;6(1):59.  
14  
15  
16 6 42. Harrison MB, Légaré F, Graham ID, Fervers B. Adapting clinical practice guidelines to  
17  
18 7 local context and assessing barriers to their use. *CMAJ.* 2010 Feb 9;182(2):E78–84.  
19  
20  
21  
22 8 43. Harrison MB, Graham ID. Roadmap for a participatory research-practice partnership to  
23  
24 9 implement evidence. *Worldviews Evid Based Nurs.* 2012 Dec;9(4):210–20.  
25  
26  
27  
28 10 44. Gagliardi AR, Berta W, Kothari A, Boyko J, Urquhart R. Integrated knowledge translation  
29  
30 11 (IKT) in health care: a scoping review. *Implement Sci.* 2016;11:38.  
31  
32  
33 12 45. Graham ID, Kothari A, McCutcheon C. Moving knowledge into action for more effective  
34  
35 13 practice, programmes and policy: protocol for a research programme on integrated  
36  
37 14 knowledge translation. *Implement Sci.* 2018 Feb 2;13:22.  
38  
39  
40  
41 15 46. Statistics Canada. Access to a regular medical doctor, 2014. Government of Canada. 2015.  
42  
43 16 <https://www.statcan.gc.ca/pub/82-625-x/2015001/article/14177-eng.htm>. Accessed 4 May  
44  
45 17 2018.  
46  
47  
48  
49 18 47. Norman WV, Guilbert E, Okpaleke C, Lichtenberg ES, Paul M, O'Connell White K, et al.  
50  
51 19 Abortion services in Canada: results of the 2012 national survey. *Contraception.* 2014 Sep  
52  
53 20 1;90(3):300.  
54  
55  
56  
57  
58  
59



- 1  
2  
3 1 48. Guilbert ER, Hayden AS, Jones HE, White KO, Lichtenberg ES, Paul M, et al. First-  
4  
5 2 trimester medical abortion practices in Canada: National survey. *Canadian Family*  
6  
7 3 *Physician*. 2016 Apr 1;62(4):e201–8.
- 8  
9  
10  
11 4 49. Norman WV, Soon JA, Maughn N, Dressler J. Barriers to rural induced abortion services in  
12  
13 5 Canada: findings of the British Columbia Abortion Providers Survey (BCAPS). *PLoS*  
14  
15 6 *ONE*. 2013;8(6):e67023.
- 16  
17  
18  
19 7 50. Dressler J, Maughn N, Soon JA, Norman WV. The perspective of rural physicians  
20  
21 8 providing abortion in Canada: qualitative findings of the BC Abortion Providers Survey  
22  
23 9 (BCAPS). *PLoS ONE*. 2013;8(6):e67070.
- 24  
25  
26  
27 10 51. Légaré F, Borduas F, Freitas A, Jacques A, Godin G, Luconi F, et al. Development of a  
28  
29 11 Simple 12-Item Theory-Based Instrument to Assess the Impact of Continuing Professional  
30  
31 12 Development on Clinical Behavioral Intentions. *PLoS One* [Internet]. 2014 Mar 18;9(3).  
32  
33 13 <https://www.ncbi.nlm.nih.gov/pmc/articles/PMC3958345/>
- 34  
35  
36  
37 14 52. Guilbert ER, Morin D, Guilbert AC, Gagnon H, Robitaille J, Richardson M. Task-shifting  
38  
39 15 in the delivery of hormonal contraceptive methods: Validation of a questionnaire and  
40  
41 16 preliminary results. *International Journal of Nursing Practice*. 2011 Jun 1;17(3):315–21.
- 42  
43  
44  
45 17 53. Hulme J, Dunn S, Guilbert E, Soon JA, Norman WV. Barriers and facilitators to family  
46  
47 18 planning access in Canada: Stakeholder input on implications for health system and policy  
48  
49 19 reform. *Healthcare Policy*. 2015 Feb;10(3):48–63.
- 50  
51  
52  
53  
54  
55  
56  
57  
58  
59

- 1  
2  
3 1 54. Saunders B, Sim J, Kingstone T, Baker S, Waterfield J, Bartlam B, et al. Saturation in  
4  
5 2 qualitative research: exploring its conceptualization and operationalization. *Qual Quant*.  
6  
7 3 2017 Sep 14;1–15.  
8  
9  
10  
11 4 55. Sandelowski M. Sample size in qualitative research. *Research in Nursing & Health*. 1995  
12  
13 5 Apr 1;18(2):179–83.  
14  
15  
16 6 56. Albrecht L, Archibald M, Arseneau D, Scott SD. Development of a checklist to assess the  
17  
18 7 quality of reporting of knowledge translation interventions using the Workgroup for  
19  
20 8 Intervention Development and Evaluation Research (WIDER) recommendations.  
21  
22 9 *Implement Sci*. 2013 May 16;8:52.  
23  
24  
25  
26 10 57. Guilbert ER, Robitaille J, Guilbert AC, Morin D. Determinants of the implementation of a  
27  
28 11 new practice in hormonal contraception by Quebec nurses. *The Canadian Journal of Human*  
29  
30 12 *Sexuality*. 2014 Jan 1. <https://www.utpjournals.press/doi/abs/10.3138/cjhs.23.1-A1>.  
31  
32 13 Accessed 4 May 2018  
33  
34  
35  
36 14 58. Morse J, Neihaus L, Wolfe R, Wilkins S. The role of the theoretical drive in maintaining  
37  
38 15 validity in mixed-methods research. *Qualitative Research in Psychology*. 2006;3(4):279-91.  
39  
40  
41  
42 16 59. Braun V, Clarke V. Using thematic analysis in psychology. *Qualitative Research in*  
43  
44 17 *Psychology*. 2006 Jan 1;3(2):77–101.  
45  
46  
47  
48 18 60. Panel on Return on Investment in Health Research. Making an impact: a preferred  
49  
50 19 framework and indicators to measure returns on investment in health research. *Canadian*  
51  
52 20 *Academy of Health Sciences*; 2009.

- 1  
2  
3 1 61. University of British Columbia. Contraception and Abortion Research Team - Groupe de  
4 recherche su l'avortement et al contraception (CART-GRAC). Team and Network. 2017.  
5  
6 2  
7  
8 3  
9  
10  
11 4 62. Norman WV, Shoveller JA, Kaczorowski J. Contraception and Abortion in BC: Experience  
12 guiding research guiding care. Richmond, BC; 2011 Apr. [http://med-fom-cart-](http://med-fom-cart-grac.sites.olt.ubc.ca/files/2015/08/CART2011ProceedingsFinal.pdf)  
13  
14 5  
15 6  
16 6  
17  
18

### 19 **AUTHORS' CONTRIBUTIONS**

20  
21 8 WVN, EG and SD developed the study concept and approach with input from all co-authors.  
22  
23  
24 9 WVN wrote the first draft of the manuscript. SM significantly contributed to the design of iKT  
25  
26 10 approach and qualitative interviews, and led all manuscript revisions. EG, SD and RR  
27  
28 11 significantly contributed to the survey design and WVN, SD and EG to the structure and content  
29  
30 12 of the Community of Practice platform. TK contributed to the design of the iKT approach. JAS  
31  
32 13 led the design of the pharmacist recruitment and data collection. MB, CD, RR, AW and MSW  
33  
34 14 contributed to study design and practitioner support elements. All authors contributed to  
35  
36 15 manuscript revisions and reviewed and approved the final manuscript.  
37  
38  
39  
40  
41  
42  
43

### 44 **FUNDING STATEMENT**

45  
46 18 This study is supported by the Canadian Institutes of Health Research Partnership for Health  
47  
48 19 System Improvement Grant (PHE148161), in partnership with Michael Smith Foundation for  
49  
50 20 Health Research (Award #16743). Dr. Norman is supported as a Scholar of the Michael Smith  
51  
52 21 Foundation for Health Research (2012-5139(HSR)), and as an Applied Public Health Research  
53  
54 22 Chair by the Canadian Institutes of Health Research (CPP-329455-107837). In kind support will  
55  
56  
57  
58  
59

1 be contributed by the Society of Obstetricians and Gynecologists of Canada, the College of  
2  
3  
4  
5  
6 2 Family Physicians of Canada, the Canadian Pharmacists Association, and the Women's Health  
7  
8 3 Research Institute of British Columbia Women's Hospital and Health Centre of the Provincial  
9  
10 4 Health Services Authority of British Columbia. The SOGC supported development and design of  
11  
12  
13 5 the Community of Practice Platform through a contract with the lead author's institution.  
14  
15  
16 6

17  
18 7 **COMPETING INTERESTS STATEMENT**

19  
20 8 The authors declare that they have no competing interests.  
21  
22  
23 9

24  
25 10 **WORD COUNT: 4914**  
26  
27  
28  
29  
30  
31  
32  
33  
34  
35  
36  
37  
38  
39  
40  
41  
42  
43  
44  
45  
46  
47  
48  
49  
50  
51  
52  
53  
54  
55  
56  
57  
58  
59  
60

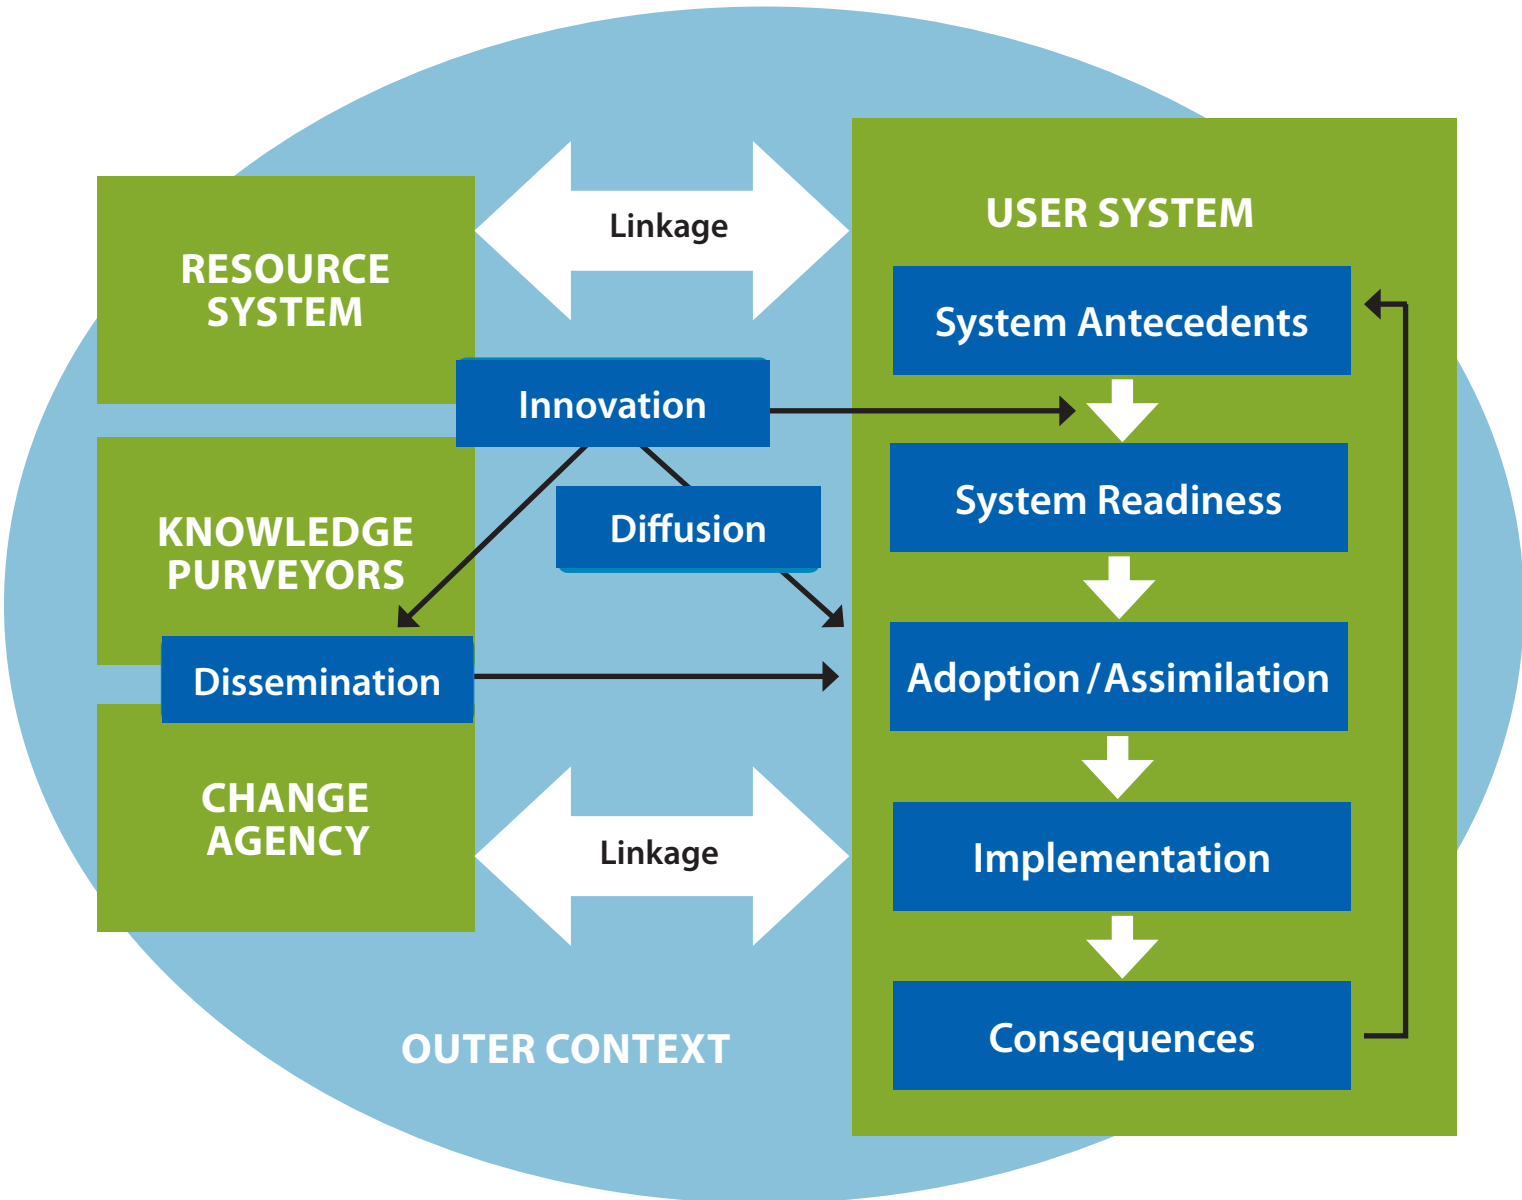

A Conceptual Model of Diffusion of Innovations in Health Service Delivery and Organizations, adapted from Greenhalgh et al. (2004)

1  
2  
3  
4  
5  
6  
7  
8  
9  
10  
11  
12  
13  
14  
15  
16  
17  
18  
19  
20  
21  
22  
23  
24  
25  
26  
27  
28  
29  
30  
31  
32  
33  
34  
35  
36  
37  
38  
39  
40  
41  
42  
43  
44  
45  
46  
47

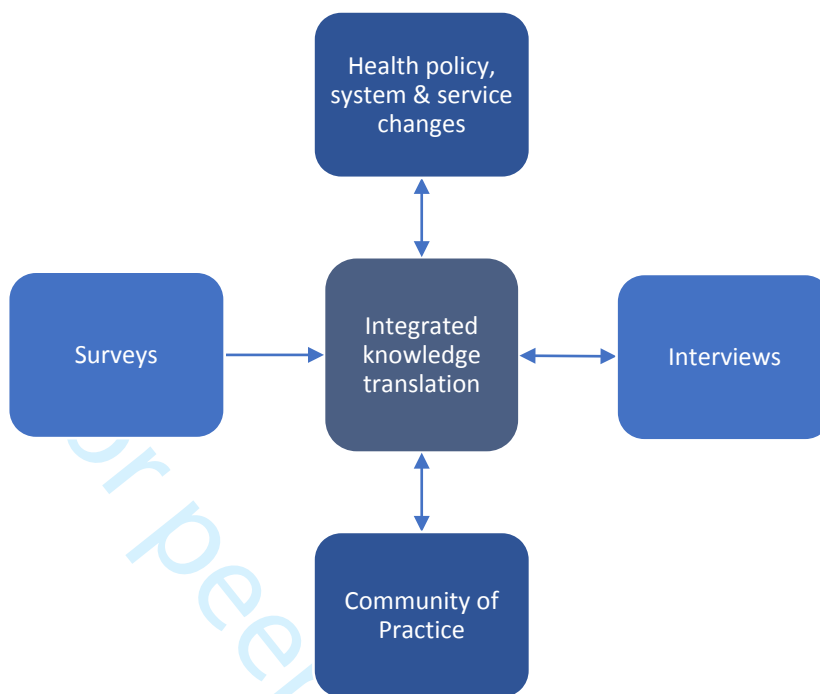

# BMJ Open

## Could implementation of mifepristone address Canada's urban-rural abortion access disparity? A mixed methods implementation study protocol

|                                 |                                                                                                                                                                                                                                                                                                                                                                                                                                                                                                                                                                                                                                                                                                                                                                                                                                                                                                                                                   |
|---------------------------------|---------------------------------------------------------------------------------------------------------------------------------------------------------------------------------------------------------------------------------------------------------------------------------------------------------------------------------------------------------------------------------------------------------------------------------------------------------------------------------------------------------------------------------------------------------------------------------------------------------------------------------------------------------------------------------------------------------------------------------------------------------------------------------------------------------------------------------------------------------------------------------------------------------------------------------------------------|
| Journal:                        | <i>BMJ Open</i>                                                                                                                                                                                                                                                                                                                                                                                                                                                                                                                                                                                                                                                                                                                                                                                                                                                                                                                                   |
| Manuscript ID                   | bmjopen-2018-028443.R1                                                                                                                                                                                                                                                                                                                                                                                                                                                                                                                                                                                                                                                                                                                                                                                                                                                                                                                            |
| Article Type:                   | Protocol                                                                                                                                                                                                                                                                                                                                                                                                                                                                                                                                                                                                                                                                                                                                                                                                                                                                                                                                          |
| Date Submitted by the Author:   | 06-Feb-2019                                                                                                                                                                                                                                                                                                                                                                                                                                                                                                                                                                                                                                                                                                                                                                                                                                                                                                                                       |
| Complete List of Authors:       | Norman, Wendy V.; University of British Columbia, Dept of Family Practice<br>Munro, Sarah; University of British Columbia, Department of Family Practice<br>Brooks, Melissa ; Dalhousie University, Department of Obstetrics and Gynaecology<br>Devane, Courtney ; University of British Columbia, Department of Family Practice<br>Guilbert, Edith; Institut national de sante publique du Quebec<br>Renner, Regina ; University of British Columbia, Department of Obstetrics and Gynaecology<br>Kendall, Tamil ; University of British Columbia, School of Population and Public Health<br>Soon, Judith ; University of British Columbia, Faculty of Pharmaceutical Sciences<br>Waddington, Ashley ; Queen's University, Department of Obstetrics and Gynaecology<br>Wagner, Marie-Soleil ; University of Montreal, Department of Obstetrics and Gynaecology<br>Dunn, Sheila; University of Toronto, Department of Family & Community Medicine |
| <b>Primary Subject Heading</b>: | Health services research                                                                                                                                                                                                                                                                                                                                                                                                                                                                                                                                                                                                                                                                                                                                                                                                                                                                                                                          |
| Secondary Subject Heading:      | Health policy, General practice / Family practice, Obstetrics and gynaecology, Public health, Reproductive medicine                                                                                                                                                                                                                                                                                                                                                                                                                                                                                                                                                                                                                                                                                                                                                                                                                               |
| Keywords:                       | Integrated knowledge translation, Knowledge mobilization, Implementation, Health policy < HEALTH SERVICES ADMINISTRATION & MANAGEMENT, Abortion                                                                                                                                                                                                                                                                                                                                                                                                                                                                                                                                                                                                                                                                                                                                                                                                   |
|                                 |                                                                                                                                                                                                                                                                                                                                                                                                                                                                                                                                                                                                                                                                                                                                                                                                                                                                                                                                                   |

SCHOLARONE™  
Manuscripts

1  
2  
3 1 **Could implementation of mifepristone address Canada's urban-rural abortion access**  
4  
5  
6 2 **disparity? A mixed methods implementation study protocol**  
7

8 3

9  
10 4 Authors:

11  
12  
13 5 Wendy V. Norman, MD, MHSc, University of British Columbia, Department of Family Practice.

14  
15 6 320-5950 University Boulevard, Vancouver, BC, Canada V6T 1Z3. [wendy.norman@ubc.ca](mailto:wendy.norman@ubc.ca)  
16

17  
18 7 Sarah Munro, PhD, University of British Columbia, Department of Family Practice. 320-5950

19  
20 8 University Boulevard, Vancouver, BC, Canada V6T 1Z3. [Sarah.munro@ubc.ca](mailto:Sarah.munro@ubc.ca)  
21

22  
23 9 Melissa Brooks, MD, Dalhousie University, Department of Obstetrics and Gynaecology.

24  
25 10 5850/5980 University Avenue, P.O. Box 9700, Halifax, Nova Scotia, Canada B3K 6R8.

26  
27  
28 11 [melissa.brooks@dal.ca](mailto:melissa.brooks@dal.ca)  
29

30  
31 12 Courtney Devane, RN, MSN, PhD Candidate, University of British Columbia, Department of

32  
33 13 Family Practice. 320-5950 University Boulevard, Vancouver, BC, Canada V6T 1Z3.

34  
35 14 [courtney.devane@ubc.ca](mailto:courtney.devane@ubc.ca)  
36

37  
38 15 Edith Guilbert, MD, MSc, Université Laval, Department of Obstetrics and Gynaecology. 2325,

39  
40 16 rue de l'Université, Québec (Québec), Canada G1V 0A6. [edith.guilbert@inspq.qc.ca](mailto:edith.guilbert@inspq.qc.ca)  
41

42  
43 17 Regina Renner, MD, MPH, University of British Columbia, Department of Obstetrics and

44  
45 18 Gynaecology. Suite 930, 1125 Howe Street, Vancouver, BC, Canada V6Z 2K8.

46  
47 19 [regina.renner@ubc.ca](mailto:regina.renner@ubc.ca)  
48

49  
50 20 Tamil Kendall, PhD, Adjunct Professor, School of Population and Public Health, 2206 East Mall,

51  
52 21 University of British Columbia, Vancouver, BC, Canada V6T 1Z3. [tamil.kendall@ubc.ca](mailto:tamil.kendall@ubc.ca)  
53

54  
55 22 Judith A. Soon, RPh, PhD, University of British Columbia, Faculty of Pharmaceutical Sciences.

56  
57 23 2405 Wesbrook Mall, Vancouver, BC, Canada V6T 1Z3. [judith.soon@ubc.ca](mailto:judith.soon@ubc.ca)  
58



1 Ashley Waddington, MD, MPA, Queen's University, Department of Obstetrics and Gynaecology.

2 Victory 4, Kingston General Hospital, Kingston, Ontario, Canada K7L 2V7.

3 [ashley.waddington@queensu.ca](mailto:ashley.waddington@queensu.ca)

4 Marie-Soleil Wagner, MD, MSc, University of Montreal, Department of Obstetrics and

5 Gynaecology. 1000, rue Saint-Denis, Montreal, QC, Canada H2X 0C1.

6 [mmsswagner@hotmail.com](mailto:mmsswagner@hotmail.com)

7 Sheila Dunn, MD, MSc, University of Toronto, Department of Family & Community Medicine.

8 76 Grenville St. Toronto, ON, Canada M5S 1B6. [Sheila.Dunn@wchospital.ca](mailto:Sheila.Dunn@wchospital.ca)

9  
10 **\* Corresponding author:**

11 Wendy V. Norman

12 320-5950 University Boulevard, University of British Columbia

13 Vancouver, BC, Canada V6T 31Z3

14 Tel: 604-875-2424 x 4990

15 Fax: 1-866-656-5544

16 [wendy.norman@ubc.ca](mailto:wendy.norman@ubc.ca)

17  
18 **Keywords**

19 Integrated knowledge translation, Knowledge mobilization, Implementation, Health policy,

20 Abortion

21  
22 Word count: 4914

23

**1 ABSTRACT****2 Introduction**

3 In January 2017, mifepristone-induced medical abortion was made available in Canada. In this  
4 study, we will seek to 1) understand facilitators and barriers to the implementation of  
5 mifepristone across Canada, 2) assess the impact of a “community of practice” clinical and  
6 health service support platform, and 3) engage in and assess the impact of integrated  
7 knowledge translation (iKT) activities aimed to improve health policy, systems, and service  
8 delivery issues to enhance patient access to mifepristone.

**9 Methods & Analysis**

10 This prospective mixed-methods implementation study will involve a national sample of  
11 physicians and pharmacists recruited via an online training program, professional networks, and  
12 a purpose-built community of practice website. Surveys that explore constructs related to  
13 Diffusion of Innovation and Godin's behaviour change frameworks will be conducted at  
14 baseline and at 6 months, and qualitative data will be collected from electronic interactions on  
15 the website. Survey participants and a purposeful sample of decision makers will be invited to  
16 participate in in-depth interviews. Descriptive analyses will be conducted for quantitative data.  
17 Thematic analysis guided by the theoretical frameworks will guide interpretation of qualitative  
18 data. We will conduct and assess iKT activities involving Canada's leading health system and  
19 health professional leaders, including evidence briefs, GIS-maps, face-to-face meetings, and  
20 regular electronic exchanges. Findings will contribute to understanding the mechanisms of iKT  
21 relationships and activities that have a meaningful effect on uptake of evidence into policy and  
22 practice.

23

1  
2  
3 **1 Ethics & Dissemination**  
4

5  
6 2 Ethical approval was received from the University of British Columbia Children's and Women's  
7  
8 3 Hospital Ethics Review Board (H16-01006). Full publication of the work will be sought in an  
9  
10 4 international peer-reviewed journal. Findings will be disseminated to research participants  
11  
12 5 through newsletters and media interviews, and to policy makers through invited evidence  
13  
14 6 briefs, and face to face presentations.  
15  
16  
17  
18  
19

20 **8 ARTICLE SUMMARY**  
21

22 **9 Strengths and limitations of this study**  
23

- 24  
25 10 • The mixed methods design of this study will provide qualitative evidence to enrich the  
26  
27 11 quantitative results and corroborate knowledge about the effect of health policy,  
28  
29 12 system, and service determinants on access to medical abortion.  
30  
31 13 • The potential of our research to make an impact on policy and practice is strengthened  
32  
33 14 by an integrated knowledge translation approach (iKT), where decision makers and  
34  
35 15 practitioners are actively involved in collecting, analyzing, and interpreting our study  
36  
37 16 data.  
38  
39 17 • Evaluation of our iKT approach of having decision makers on the research team will  
40  
41 18 contribute critical knowledge on which strategies are most effective at facilitating co-  
42  
43 19 produced knowledge, mitigating barriers, and improving equitable access to abortion.  
44  
45  
46  
47  
48  
49  
50  
51  
52  
53  
54  
55  
56  
57  
58  
59  
60

## 1 INTRODUCTION

2 Induced abortion is a common, safe, and legal reproductive health procedure in Canada, with  
3 nearly one in three Canadian women having at least one abortion during their reproductive  
4 years.[1–3] However, access to abortion is not equitable. In 2012, 96% of Canadian abortions  
5 were performed using surgery, through fewer than 100 facilities, mostly located primarily in  
6 Canada's largest cities within 150 km of the US border.[3,4] Historically in Canada, abortion  
7 provision has been included within the scope of practice only for physicians, and in 2012, it was  
8 offered by fewer than 300 doctors.[3,5] Under these conditions, patients living outside of major  
9 cities had to travel inordinate distances to reach service locations, experienced significant wait  
10 times, and faced numerous barriers to equitable access to abortion service.[6,7] Notably, The  
11 United Nations Human Rights Commissioner's November 2016 Report of the *Committee on*  
12 *Elimination of Discrimination Against Women* expressed concern over inequitable abortion  
13 access in Canada and called on the government of Canada to demonstrate improvement.[8]  
14 Canada's federal drug regulator, Health Canada, approved mifepristone, the gold standard for  
15 medical abortion,[5] in July of 2015.[9] Subsequently, mifepristone first became available to  
16 Canadians on January 10<sup>th</sup>, 2017.[10]  
17 Mifepristone was first introduced to the global marketplace in 1988. In other nations the drug  
18 has not been associated with an increase in overall abortion rates, while it has increased the  
19 proportion of medical abortion compared to surgical.[11] Widely differing rates of mifepristone  
20 implementation, particularly in primary care settings, have been noted world-wide among  
21 countries with approval.[11–16] Uptake in the USA was among the slowest: at 10 years after  
22 approval, only 10% of all abortions were provided by mifepristone, compared to 70% in  
23 Scotland and 80% in northern Europe.[11,13,14,16] Variation in health systems, provider

1 training, provider support, drug regulations, and legislated restrictions may account for these  
2 differences. Canada's geographic disparities in access to abortion care, particularly among rural  
3 and remote populations, call for innovative approaches to the implementation of mifepristone  
4 services, including strategies to support primary care providers to initiate and sustain abortion  
5 services. Mifepristone implementation has the potential to address current abortion service  
6 disparities and health access inequities, particularly among disadvantaged populations.  
7 When mifepristone was approved in Canada, Health Canada specified several unique  
8 restrictions that could act as significant barriers to access. Namely, only physicians may  
9 prescribe and dispense mifepristone, and that those who provide mifepristone must be  
10 certified through an accredited online training program.[9,17] Our multidisciplinary research  
11 team theorizes that mifepristone training and practice could be undertaken by a range of  
12 healthcare professionals who are interested in providing mifepristone, including family  
13 physicians, nurse practitioners and midwives. Further we postulate that, based on the above  
14 cited evidence from international settings, mandatory training and certification without  
15 additional practice support will be insufficient to facilitate adoption and distribution of this  
16 innovation in the face of the federal restrictions, particularly among primary healthcare  
17 professionals in rural areas and/or without prior experience providing abortion. We further  
18 hypothesize that the identification and mitigation of implementation barriers and facilitators at  
19 the health policy, system, and service delivery levels, particularly those affecting primary care  
20 providers, could advance mifepristone practice in Canada and improve equitable abortion care  
21 access.

22 Our study is informed by principles of integrated knowledge translation (iKT) [18] and Roger's  
23 Theory of the Diffusion of Innovation [19] in seeking to answer the question: *What are the*

1  
2  
3 1 *factors that influence successful initiation and ongoing provision of medical abortion services*  
4  
5 2 *among health professionals, and how do these relate to health policies, systems, and services,*  
6  
7 *and to abortion services access throughout Canada?*  
8  
9

## 10 4 11 12 13 5 **METHODS**

### 14 15 6 **Aims**

16  
17  
18 7 The aims of this study are:

- 19  
20 8 • To understand health policy, system and service facilitators and barriers to the  
21  
22 9 distribution and implementation of mifepristone abortion practice in primary care.  
23  
24 10 • To assess the impact of a “Community of Practice” platform to detect and support  
25  
26 11 clinical, health service, and system challenges faced by clinicians adopting mifepristone  
27  
28 12 medical abortion practice.  
29  
30 13 • To evaluate continuous iKT with and by health policy, health system, and health services  
31  
32 14 decision makers and health professional organizations to reduce barriers, and optimize  
33  
34 15 facilitators, for mifepristone abortion practice.  
35  
36  
37  
38  
39

40 16 This study protocol is guided by the Standards for Reporting Implementation Studies (StaRI)  
41  
42 17 statement.[20]  
43  
44

### 45 18 46 47 19 **Conceptual Frameworks**

48  
49 20 Our study uses a theoretical framework combining two theories to explain adoption and  
50  
51 21 diffusion of innovations: *Roger’s Theory of the Diffusion of Innovation* and *Godin’s framework*.  
52  
53 22 *Greenhalgh et al.* [19] developed constructs to capture determinants for implementation, as  
54  
55 23 articulated by *Rogers’ Theory of the Diffusion of Innovation*,[21] in health service delivery and  
56  
57  
58  
59

1 health systems (see Figure 1). This comprehensive theoretical model of dissemination and  
 2 implementation of health service innovations aims to support research for bridging the gap  
 3 between knowledge and practice/policy. The model was developed from a systematic meta-  
 4 narrative review of scientific evidence on factors related to implementation.[19] It articulates  
 5 key constructs for capturing the complex processes of implementation: characteristics of the  
 6 innovation and adopter; methods of diffusion and dissemination (e.g. communication and  
 7 influence); system antecedents and readiness; outer context; resource systems and change  
 8 agents; and their role in facilitating the implementation process.[19] Cook *et al.* operationalized  
 9 these constructs into semi-structured survey and interview questions to allow researchers to  
 10 generate evidence on barriers and enablers to implementation.[22]

11  
 12 **Figure 1. Determinants of diffusion of innovations in health service delivery organizations,**  
 13 **adapted from Greenhalgh *et al.* [19]**

14  
 15 Within these constructs we further explore provider uptake and behaviours using *Godin's*  
 16 *framework*,[23] integrating the Theory of Planned Behaviour,[24] and Triandis' Theory,[25] to  
 17 predict intention and uptake of clinical behaviour. The strongest predictors of behaviour are  
 18 intention, belief about capabilities, and frequency of past behaviour. Intention is influenced by  
 19 belief about consequences, role identity, moral norm, social influences, and personal  
 20 characteristics. This framework has good application to practice in the abortion context, where  
 21 role identity, moral norm, and social factors could have strong influence on behaviour.[26]

22  
 23 **Design**

1 We designed a prospective mixed methods observational research study on factors that  
2 influence implementation of mifepristone in primary care over the initial two years of practice  
3 in Canada. We hypothesized that healthcare professionals interested in adopting mifepristone  
4 care into their practice would have widely varied professional characteristics, practice locations  
5 and settings, and local or health system supports, and would serve a wide variety of  
6 disadvantaged and vulnerable populations; all of which may influence implementation and  
7 access to care. Our national, interprofessional research team (nursing, medicine, pharmacy,  
8 epidemiology, implementation science, medical sociology, computer science, public health, and  
9 education) is comprised of senior, mid, and early career investigators, national and provincial  
10 policy makers, health care and health professional organizations, clinicians, citizen groups, and  
11 trainees. Our design is flexible and will be adapted in response to health system and policy  
12 changes. This will allow us to collect data in the setting, samples, and contexts that may provide  
13 the richest information to answer our research questions.

### 15 **Health System Intervention**

16 Mifepristone is marketed, in combination with misoprostol in Canada, as Mifegymiso<sup>®</sup>, for the  
17 indication of early medical abortion (one mifepristone 200 mg tablet and four misoprostol 200  
18 mcg tablets). Mifepristone is used in more than 60 countries worldwide, is on the World Health  
19 Organization list of essential medicines,[27] and has an excellent safety and effectiveness  
20 profile as illustrated by administration to millions of women.[28–30]  
21 Mifepristone provided in primary care settings is an innovative health service delivery model for  
22 medical abortion. Until now, high-income country drug regulators have placed a range of  
23 unique restrictions on the distribution and administration of mifepristone,[31,32] which has



1 largely limited provision of mifepristone to abortion providers in existing urban sexual and  
 2 reproductive specific health facilities, that generally provide a high volume of surgical abortion  
 3 services. In Australia, for instance, mifepristone by prescription that could be filled in a  
 4 pharmacy was approved in 2012, but restrictions including provider and pharmacist training  
 5 and certification limited initial uptake.[33] Similar restrictions were approved in Canada as part  
 6 of the initial 2015 drug approval [9,17] (see Table 1).

8 **Table 1. Canadian Restrictions for Prescribing and Dispensing Mifepristone, July 2015**

|                                                                                   |
|-----------------------------------------------------------------------------------|
| Mandatory training for prescribers and pharmacists                                |
| Mandatory registration of prescribers and pharmacists with the manufacturer       |
| Physician-only prescribing                                                        |
| Physician-only dispensing direct to the patient                                   |
| Mandatory use of a manufacturer-provided consent form to be signed by the patient |
| Physician's observation of mifepristone ingestion                                 |

9  
 10 Nonetheless, mifepristone abortion delivered in primary care settings by physicians and other  
 11 skilled providers has been shown to be safe and effective.[12–14,28–30,34–36] In this context,  
 12 we will seek to identify, initiate, and evaluate two implementation strategies that aim to  
 13 overcome clinical, health service, and system challenges faced by clinicians adopting  
 14 mifepristone medical abortion practice, particularly in primary care settings.

15  
 16 **Implementation Strategy**

17 *A. Community of Practice platform*

1  
2  
3 1 The central iKT strategy for this study is the collaborative interdisciplinary community of  
4  
5 2 practice – with the objective of sharing real-time clinical best practices, disseminating  
6  
7 3 information, advocating for and sharing policy changes to support timely and equitable access  
8  
9 4 to mifepristone medical abortion by bringing together health providers, policy, and system  
10  
11 5 partners and our team of investigators and knowledge users. As Wenger explains,  
12  
13 6 “communities of practice are groups of people who share a concern, a set of problems, or a  
14  
15 7 passion about a topic, and who deepen their knowledge and expertise in this area by  
16  
17 8 interacting on an ongoing basis.”[37] The principle underlying communities of practice is that  
18  
19 9 practitioners advance their skills and knowledge both on the job and off work through *social*  
20  
21 10 *relationships*, rather than in classroom settings.[38] Social learning through a social structure  
22  
23 11 facilitates learning a practice through interactions, relationships, and sharing of resources and  
24  
25 12 solutions to build skills and knowledge. The rationale for including a community of practice  
26  
27 13 strategy was derived from the international literature on mifepristone practice in other high-  
28  
29 14 income nations, and was reinforced by findings from focus group research involving Canadian  
30  
31 15 physicians in which we developed and pilot tested the survey for this present study.[39,40]  
32  
33 16 We created a community of practice platform for the present study: the Canadian Abortion  
34  
35 17 Providers Support-Communauté de pratique canadienne sur l’avortement (CAPS-CPCA), an  
36  
37 18 internet accessible web site. It is designed to encourage multi-directional interaction of  
38  
39 19 healthcare professionals engaging in mifepristone practice with the experts and researchers  
40  
41 20 and will promote sharing best practice resources and facilitators. Interactive pages (“Ask an  
42  
43 21 Expert” and “Share a Case”) will promote asynchronized dialogue while resource pages  
44  
45 22 (“What’s happening in your province?”, “Locate a Pharmacy,” and “Helpful Resources”) will  
46  
47 23 provide practical, local knowledge for members to apply in their individual practices. Members  
48  
49  
50  
51  
52  
53  
54  
55  
56  
57  
58  
59

1 will be provided news updates on topics relevant to mifepristone practice, such as practice  
2 tools, billing codes, regulation changes, and universal coverage.

3 *B. Integrated knowledge translation activities*

4 We follow the Canadian Institutes of Health Research definition of iKT, which describes it as “an  
5 approach to doing research that applies the principles of knowledge translation to the entire  
6 research process. The central premise of iKT is that involving knowledge users as equal partners  
7 alongside researchers will lead to research that is more relevant to, and more likely to be useful  
8 to, the knowledge users.”[18] We anticipate that our iKT approach will more rapidly mitigate  
9 barriers and improve equitable access to abortion, with the assumption that stakeholders will  
10 be more likely to accept and act on co-produced knowledge.[41,42] Using iKT processes to  
11 achieve particular objectives focuses researchers and stakeholders on the same page to create  
12 shared meaning, identify facilitators and barriers to the process of evidence implementation,  
13 and co-create empirical knowledge to support health service planning. As a result, the  
14 partnership process itself is instrumental in implementing sustainable change.[43] The effect of  
15 iKT activities on research outcomes such as practice and policy change is still unclear, largely  
16 due to inconsistent description, evaluation, and reporting in most studies.[44] However, there  
17 is emerging evidence from Canada and the UK that iKT may lead to increased capacity to use  
18 research among knowledge users, greater relevance and usefulness of research evidence to  
19 knowledge users, increased use of research in decision-making, and improved patient and  
20 health system outcomes.[45]

21 In the context of this study our iKT activities are diverse, responsive, and tailored to the needs  
22 and contexts of stakeholders. These activities include but are not limited to: invited evidence  
23 briefs, face to face meetings, media interviews, minutes documenting interactions within

1  
2  
3 1 monthly multidisciplinary team video-conferenced meetings and at annual national  
4  
5 2 collaboration meetings. Face-to-face interaction will optimize relationships, apprise knowledge  
6  
7 3 users of progress, and ensure the flow of ideas. Both clinician and policy maker knowledge  
8  
9 4 users will be welcomed to join our monthly meetings, to contribute actively to the evaluation  
10  
11 5 and interpretation of data collected each month, and to plan to address identified barriers and  
12  
13 6 facilitators in real time. Knowledge users may identify colleagues for face-to-face meetings  
14  
15 7 relevant to specific phases of the project. Our meeting agendas will address topics from policy  
16  
17 8 development, to education input, to practice. Our investigators and knowledge users will be  
18  
19 9 invited to convey results to other knowledge user organizations, such as: health professional  
20  
21 10 development at national, provincial, and regional health professional meetings; post-secondary  
22  
23 11 institution faculty providing health practitioner education programs (informing pre-licensure  
24  
25 12 training); provincial colleges of health professionals (informing licensure bodies); and  
26  
27 13 community sexual health organizations across Canada. Quarterly briefs will engage team  
28  
29 14 knowledge users, health professional participants, community organization partners, and  
30  
31 15 appropriate colleagues and collaborators identified by them, to encourage informed updated  
32  
33 16 approaches.  
34  
35  
36  
37  
38  
39  
40  
41  
42  
43  
44

## 45 **Patient and Public Involvement**

46  
47 19 Patient partners were involved in co-designing the research questions and outcome measures.  
48  
49 20 Patients and representatives from community-based sexual health organizations across Canada  
50  
51 21 were engaged through a face-to-face symposium in October 2015 and participated in regular  
52  
53 22 monthly video-conference meetings. Through deliberation and dialogue, they discussed with  
54  
55 23 the research team their perspectives on priority areas of study, and recruitment strategies for  
56  
57  
58  
59

1 participants in rural and remote communities. As potential participants did not include patients  
2 or members of the public, only health care professionals were asked to assess the burden of the  
3 intervention and the time required to participate in research. Representatives from community-  
4 based sexual health organizations reviewed and provided feedback on our finalized research  
5 questions and design during the monthly videoconferences. They will be involved in  
6 disseminating study results to the public through infographics shared in presentations and by  
7 email with their networks.

## 9 **Setting and Participants**

10 This national study will explore mifepristone medical abortion in the context of primary care  
11 settings. In Canada, 85% of Canadians have a regular medical doctor [46] and provision of  
12 abortion by primary care providers is highly acceptable – the majority of surgical abortion  
13 providers are family physicians.[47] For the purposes of this study we define primary care  
14 settings as any service delivery environment where a prescriber may provide primary care,  
15 including hospitals, abortion facilities, health centres, and private physician offices. Consistent  
16 with the initial Health Canada approval of the medication, we defined prescriber as a certified  
17 physician.

### 18 *Group A: Healthcare Professionals engaged with mifepristone practice:*

19 Survey and interview enrollment for part 1 of the study is offered to all certified prescribers and  
20 pharmacists who intend to begin practice with mifepristone within the first year they are  
21 eligible to do so. As our past studies among abortion providers have recruited ~90% of eligible  
22 participants,[3,46–48] we anticipate the cohort will be highly representative. We estimate up to  
23 1,000 healthcare professionals would engage in mifepristone practice within the first year.

1  
2  
3 1 *Group B: Community of practice platform*

4  
5  
6 2 The community of practice website will engage a wide range of interdisciplinary licensed  
7  
8 3 healthcare professionals who are interested in providing mifepristone care, including certified  
9  
10 4 prescribers and pharmacists. We will capture data from all members who enroll in the platform.

11  
12  
13 5 *Group C: Health policy, system, and services decision makers and non-mifepristone providing*  
14  
15 6 *health care professionals:*

16  
17  
18 7 We will recruit influential decision makers across Canada who have the potential to impact  
19  
20 8 health policy, system, and service factors found to be important determinants of  
21  
22 9 implementation, as they are identified throughout the study. We will also engage health care  
23  
24 10 professionals who do not choose to provide mifepristone, particularly if they are providing  
25  
26 11 similar women's health services, using key informant interviews or focus groups. These non-  
27  
28 12 mifepristone providing health care professionals represent a population with an important  
29  
30 13 viewpoint to assist us to understand barriers.

31  
32  
33  
34  
35 14 *Group D: Knowledge users engaged with iKT activities*

36  
37  
38 15 Knowledge users have been involved in the research process from idea inception (questions  
39  
40 16 and design elements posed by our knowledge user collaborators) to the development of this  
41  
42 17 study to delineate facilitators and inform changes to the health system to facilitate  
43  
44 18 implementation. They include health policy and practice decision-makers at the regional,  
45  
46 19 provincial, and federal levels. We will invite these individuals and organizations to participate in  
47  
48 20 data collection for the evaluation of our iKT activities.

49  
50  
51  
52  
53  
54 22 **Outcomes**

1 We will evaluate the effect of our mixed methods, iKT implementation study on health system  
2 and policy decision-making, regulatory changes, and upon uptake of mifepristone. We will  
3 assess the uptake of mifepristone medical abortion by measuring the proportion of certified  
4 physicians and pharmacists (per professional category) who are providing mifepristone care 1-  
5 year post enrollment, at least once in the most recent 3 months in which they were in their  
6 usual practice. In addition, we will explore: 1) the number of communities or populations that  
7 have access to abortion compared to baseline; 2) the proportion of certified healthcare  
8 professionals providing mifepristone at 6 months post enrollment (by professional category and  
9 by location, e.g. urban vs rural, province); and 3) the volume of service provision at 1-year and  
10 correlates, particularly compared to baseline distribution of abortion service providers and  
11 facilities.

12 Additionally, based on our mixed methods analysis, we will develop an empirically-driven  
13 framework of diffusion of innovation in a health system, that builds on and extends Greenhagh  
14 *et al.*'s theory.

15 We will also be flexible to identify and collect outcomes of interest to our policy maker  
16 stakeholders, as part of our ongoing iKT approach.

## 18 **Data Collection**

19 Our project incorporates five key inter-related evaluation components (Figure 2):

- 20 1. Continuous iKT activity interactions with key knowledge users and decision makers in  
21 health policy, health system, health professional organization and regulation, and health  
22 services delivery contexts; and

- 1
- 2
- 3 1 2. Evaluation of iKT interactions with knowledge users and decision makers, and relation to
- 4
- 5
- 6 2 any associated health policy, system, and service changes during the project.
- 7
- 8 3 3. Surveys and interviews among healthcare professionals who are interested in providing
- 9
- 10 4 mifepristone care;
- 11
- 12
- 13 5 4. Quantitative and qualitative data collected from interactions on a community of
- 14
- 15 6 practice support platform for healthcare professionals, the Canadian Abortion Providers
- 16
- 17 7 Support- Communaute de pratique Canadienne sur l'avortement (CAPS-CPCA) platform;
- 18
- 19
- 20 8 5. Interviews with key health system and services decision makers and informants, and
- 21
- 22 9 with healthcare professionals who are engaged with women's health but choose not to
- 23
- 24 10 provide mifepristone care;
- 25
- 26
- 27
- 28 11
- 29

## 30 12 **Figure 2. Canada's Mifepristone Implementation Study, components of study design**

31

32 13

33

34

35 14 **1. Surveys:** We will distribute questionnaires among *Healthcare Professionals engaged with*

36

37 15 *mifepristone practice* (Group A) to measure factors related to adoption of mifepristone

38

39 16 abortion into practice [49,50] *and* to explore constructs for diffusion of innovation. As

40

41 17 appropriate, components of either or both sections will be administered at baseline, 6 and 12

42

43 18 months. Participant demographics will be collected at baseline.

44

45

46

47 19 **Section 1** Component surveys for the constructs of Diffusion of Innovation will be

48

49 20 administered. Constructs that are expected to change over time will be examined at

50

51 21 baseline and later time points (e.g., task issues, skills); constructs relating to factors

52

53 22 unknown at baseline (e.g., characteristics of diffusion) will be collected at 12 months.

54

55

56

57

58

59

60



1  
2  
3 **Section 2** A 12-item questionnaire adapted from Légaré's validated instrument [51]

4  
5 based on the Godin framework will be administered at baseline, 6, and 12 months.

6  
7  
8 The survey instruments used in this study were developed and tested following methods  
9  
10 described elsewhere. [51,52] Additionally, we conducted a rigorous process to develop and test  
11  
12 the surveys used to measure implementation of mifepristone.[40] The process for adapting and  
13  
14 pilot testing the surveys for the present study is described in a forthcoming publication.  
15  
16

17  
18  
19  
20 **2. Interviews:** Semi-structured interviews will be conducted with a purposeful sample of the  
21  
22 certified physicians and pharmacists of Group A, selected to represent diversity of:  
23  
24 demographic characteristics (e.g. gender, age, profession); factors related to adoption and  
25  
26 diffusion of mifepristone practice (such as previous abortion practice and rural vs. urban  
27  
28 location); and positive and negative experiences of abortion practice within 1-year post-training  
29  
30 (to investigate the factors that affect implementation). Recruitment will be facilitated via the  
31  
32 online survey. All healthcare professionals enrolled in the broader study will be asked, upon  
33  
34 completing the survey, if they would like to be contacted for a follow-up interview. Interested  
35  
36 and eligible physician and pharmacist certificants will be contacted to arrange a follow-up  
37  
38 interview in person or by phone. No interview participants will be recruited via Group B, the  
39  
40 Community of Practice, although certificants from Group A may also be members of the  
41  
42 Community.  
43  
44

45  
46  
47 Health policy, system, and services decision makers and non-mifepristone providing health care  
48  
49 professionals (Group C) and stakeholders involved in our iKT activities (Group D) will be  
50  
51 purposefully sampled based on pre-identified factors [49,53] (e.g. profession, previous  
52  
53 experience in abortion policy development or service provision, number of years as a  
54  
55  
56  
57  
58  
59

1  
2  
3 1 knowledge user with the research team) and invited to participate in an interview. Group C  
4  
5 2 participants will be invited via third party recruitment with the assistance of the study's  
6  
7  
8 3 knowledge user partners. Group D participants will be invited by email to participate in an  
9  
10 4 interview with our research team's implementation scientist. As categories emerge from  
11  
12 5 analysis of transcripts, theoretical sampling will be conducted to pursue emerging themes  
13  
14 6 related to policy, system, and/or service factors that influence implementation.  
15  
16  
17 7 Interview questions will be theoretically informed by Diffusion of Innovation constructs, and  
18  
19 8 Cook *et al.*'s interview guide [22] will be pilot tested with a panel of researchers and clinicians  
20  
21 9 prior to data collection. Interviews will be conducted until we achieve saturation in our data  
22  
23 10 collection, sampling, and analysis.[54] In our data collection we will seek "informational  
24  
25 11 redundancy" [55] (new data repeat what was expressed in previous data). We will recruit  
26  
27 12 participants until no new themes or codes are identified in analysis and we have sufficient data  
28  
29 13 to illustrate the core constructs of Diffusion of Innovation theory. We will also seek to recruit  
30  
31 14 participants until our data sufficiently represents a range of the pre-identified factors from our  
32  
33 15 purposeful sampling strategies.  
34  
35  
36  
37  
38  
39  
40  
41

42 17 **3. Data Collection through the Community of Practice:** Data from the community of practice  
43  
44 18 platform will include reports of barriers and facilitators; responses to iterative 1-question polls  
45  
46 19 (based on surveys); questions to experts and participant usage statistics. Relationships within  
47  
48 20 the community of practice and with the research team will enable identification of challenges,  
49  
50 21 which will be shared with knowledge users via the iKT activities listed below.  
51  
52  
53  
54  
55  
56

#### 57 23 **4. Evaluation of Integrated Knowledge Translation**

58  
59  
60

1 To capture and understand the effectiveness of iKT strategies we will document our activities  
2 using the Workgroup for Intervention Development and Evaluation Research (WIDER) reporting  
3 checklist [56] as recommended by Gagliardi et al.[44] Checklist constructs include: the goal of  
4 the activity and iKT partnership, mode of delivery, duration, frequency, participants, and  
5 personnel. We will also document funding source, who initiated the activity, and the theory  
6 underpinning the activity. Semi-structured interviews with stakeholders, interactions on the  
7 Community of Practice platform, and health system, policy, and service changes occurring in  
8 real time from our correspondence with knowledge users and decision makers will help us  
9 document the effect of our iKT strategies. As described above, these activities will be diverse  
10 and responsive to our knowledge user audiences and may include invited evidence briefs,  
11 quarterly briefs, face to face meetings, email and phone communication, media interviews,  
12 newsletters, and minutes of monthly videoconferences.

13

## 14 **ANALYSIS**

### 15 **1. Quantitative Data**

16 Survey responses will be summarized descriptively over the entire sample. Stratified analysis  
17 will be performed for key determinants (i.e., Federal, Provincial, or Local according to the  
18 issue). For provider characteristics we will collect data on age, gender, rural vs urban setting,  
19 professional role (overall and by specialty), previous abortion provision, and independent  
20 practice vs working in a setting with two or more abortion providers. In light of Quebec's well-  
21 developed support for rural and remote providers,[48,57] we will perform a two-way  
22 stratification by a) Quebec vs the rest of Canada and b) rural/urban status. Additionally,  
23 location data will be collected on all participants to inform geo-mapping analyses on the

1  
2  
3 1 emergence and diffusion of mifepristone practice (and the sub-groups by practitioner and with  
4  
5  
6 2 relation to provincial, national, or regional policies, systems, and service structures) throughout  
7  
8 3 Canada. We will analyze interactions of factors using multivariable logistic regression for binary  
9  
10 4 (e.g. provision of mifepristone) and ordinal (e.g. barriers and facilitators) outcomes, and linear  
11  
12  
13 5 multiple regression for volume of service. Emerging results will be used to inform iKT  
14  
15  
16 6 interactions throughout the project.

17  
18 7       Following Morse's guidance, our mixed methods design is quantitatively driven with a  
19  
20 8 simultaneous qualitative component.[58] Our survey and CAPS analysis will inform the  
21  
22  
23 9 development of probing questions to ask during interviews. Analysis will be simultaneous using  
24  
25 10 constant comparison methods; qualitative results will be used to enhance description of  
26  
27  
28 11 quantitative results and to corroborate knowledge from our different data sources to clarify key  
29  
30 12 barriers and facilitators.

31  
32  
33  
34

## 35 14 **2. Qualitative Data**

36  
37 15 Semi-structured interviews, open-ended survey questions, and CAPS website posted  
38  
39  
40 16 discussions will be subjected to thematic analysis [59] by two qualitatively-trained  
41  
42  
43 17 implementation scientists following confidential transcription. Analysis of qualitative data will  
44  
45 18 involve these iterative, concurrent steps:

- 46  
47 19       1) Developing a codebook by identifying contextual codes related to the research  
48  
49  
50 20             objective (identified inductively from the participant data). The two researchers will  
51  
52 21             first code a sample of transcripts independently and compare their results to ensure  
53  
54  
55 22             accurate interpretation of the data. Discrepancies will be resolved through  
56  
57 23             discussion with a third researcher.

1  
2  
3 1 2) Identifying individual, organizational, and system processes (including patterns,  
4  
5  
6 2 relationships, and interactions) between the codes.

7  
8 3 3) Organizing the processes into a theoretical framework informed by Diffusion of  
9  
10 4 Innovation constructs. Relevant domains for implementation will be identified  
11  
12 5 through research team discussion and consensus.

13  
14  
15 6 4) Writing the analysis into a descriptive, explanatory narrative that illuminates the  
16  
17 7 barriers and facilitators to implementation of mifepristone abortion practice.

18  
19  
20 8 We will test and extend the theory of Diffusion of Innovation. We will consider the frequency of  
21  
22 9 constructs across the data, presence of conflicting constructs, and perceived relevance of the  
23  
24 10 constructs on implementation behaviour. Emerging results will be used to inform iKT  
25  
26 11 interactions throughout the project to identify and mitigate addressable barriers.  
27  
28  
29

### 30 12 31 32 13 **3. Analysis of Integrated Knowledge Translation Activities Data**

33  
34  
35 14 We will analyse the iKT activity and outcome data, evaluating alignment with theoretical model  
36  
37 15 constructs and addressable barriers identified through the research activities. Qualitative  
38  
39 16 thematic analysis [59] of stakeholder interviews will explore health system and policy factors  
40  
41 17 that influence implementation at regional, provincial, and federal levels, as well as the impact  
42  
43 18 of iKT activities on implementation of mifepristone in primary care. As our additional iKT  
44  
45 19 strategies will be emergent, dynamic, and chosen in response to knowledge user and  
46  
47 20 stakeholder need, we will also measure the impact of additional iKT strategies using  
48  
49 21 appropriate methods and outcomes, selection of which will be guided by the Canadian  
50  
51 22 Academy of Health Sciences Impact Framework.[60] All interactions collected will be compared  
52  
53 23 with any subsequent positive, negative, or null changes to health system factors that influence  
54  
55  
56  
57  
58  
59

1 implementation of mifepristone. The mechanisms related to any iKT activity will be delineated  
2 to assign scaled values for: the impetus (i.e., knowledge user, researcher, media/public); the  
3 activity; the participants (categorized as per stakeholder groups); results; and an assignment of  
4 an impact score for the effectiveness of the activity to contribute to changes in health policy,  
5 system or service delivery advancing mifepristone care.

## 7 **ETHICS AND DISSEMINATION**

8 Ethical approval was obtained from the University of British Columbia Children's and Women's  
9 Hospital Research Ethics Review Board (H16-01006) prior to enrollment of participants. All  
10 participants in this study will participate in full informed consent. For survey participants,  
11 completion and submission of the survey will constitute implied consent; for interview  
12 participants, a signed consent form will be required prior to participation.

### 14 **Dissemination plan**

15 The study commenced on January 1, 2017 and its expected completion date is January 1, 2020.  
16 Full publication of the work will be sought in an international peer-reviewed journal. Findings  
17 will be disseminated to research participants through newsletters and media interviews, and to  
18 policy makers through invited evidence briefs, and face to face presentations.

## 20 **DISCUSSION**

21 Knowledge and system improvements generated by this project have the potential to increase  
22 the proportion of all abortions that are provided medically. In turn, this could:

- 23 • Reduce need and systems costs for surgical abortion;

- 1 • Increase delivery of services closer to home, reducing travel and wait times;
- 2 • Increase delivery of services by the primary care provider, decreasing the need for
- 3 referrals;
- 4 • Increase abortion safety, as medical abortion can be provided at the earliest and safest
- 5 stages of pregnancy;
- 6 • Increase confidentiality and reduce the need for patients and health care providers to
- 7 face interactions with protesters;
- 8 • Benefit hospitals by relieving pressure on operating room time and wait lists, while
- 9 reducing stigma reported by abortion providers working in operating room settings.

10  
11 The proposed timely research, undertaken by our well-established cross-sectoral national  
12 network, the Contraception & Abortion Research Team-Groupe de recherche sur l'avortement  
13 et la contraception (CART-GRAC),[53,61,62] will identify the determinants of uptake of medical  
14 abortion as this health service innovation is implemented in Canada. We aim to understand,  
15 and in real time to address, barriers and facilitators to adoption of this new clinical practice. In  
16 addition, we have planned separate studies to assess health outcomes and costs of  
17 mifepristone using linked administrative datasets, as well as investigate the role of nurse  
18 practitioners and registered midwives in the provision of medical abortion in Canada.  
19 Knowledge about the effect of the full range of health policy, system and service determinants  
20 on access to mifepristone abortion is needed to realize the potential to increase equitable, safe,  
21 confidential abortion care closer to home for women throughout Canada. Findings also will  
22 contribute to understanding the mechanisms of iKT relationships and activities that have a  
23 meaningful effect on uptake of evidence into policy and practice.

1  
2  
3 1  
4  
5  
6 2 **Acknowledgements:** Thank-you to Jennifer Blake, Rollin Brant, Stirling Bryan, Dustin Costescu,  
7  
8 3 Cheryl Davies, Philip Emberley, Janusz Kaczorowski, Dorothy Shaw, and Eleni Stroulia for  
9  
10 4 providing their expert and professional feedback in preparing this study.  
11  
12  
13 5

## 6 FULL REFERENCES

- 17  
18 7 1. Norman WV. Induced abortion in Canada 1974-2005: trends over the first generation with  
19  
20 8 legal access. *Contraception*. 2012 Feb;85(2):185–91.  
21  
22  
23 9 2. Canadian Institute for Health Information. Induced abortions performed in Canada in 2015.  
24  
25 Canadian Institutes of Health Information. 2017. <http://www.cihi.ca/>. Accessed 30 Mar  
26 10  
27 2017  
28 11  
29  
30  
31 12 3. Norman WV, Guilbert ER, Okpaleke C, Hayden AS, Steven Lichtenberg E, Paul M, et al.  
32  
33 13 Abortion health services in Canada. *Can Fam Physician*. 2016 Apr;62(4):e209–17.  
34  
35  
36  
37 14 4. Kaposy C. Improving abortion access in Canada. *Health Care Anal*. 2010 Mar;18(1):17–34.  
38  
39  
40 15 5. Dunn S, Cook R. Medical abortion in Canada: behind the times. *CMAJ*. 2014 Jan  
41  
42 16 7;186(1):13–4.  
43  
44  
45  
46 17 6. Sethna C, Doull M. Spatial disparities and travel to freestanding abortion clinics in Canada.  
47  
48 18 *Women's Studies International Forum*. 2013 May 1;38:52–62.  
49  
50  
51 19 7. Sethna C, Doull M. Far from home? A pilot study tracking women's journeys to a Canadian  
52  
53 20 abortion clinic. *J Obstet Gynaecol Can*. 2007 Aug;29(8):640–7.  
54  
55  
56  
57  
58  
59



- 1 8. United Nations Office of the High Commissioner on Human Rights. Convention on the  
2 Elimination of All forms of Discrimination against Women, Concluding observations on the  
3 combined eighth and ninth periodic reports of Canada. Committee on the Elimination of  
4 Discrimination against Women . 2016 Nov.  
5 <http://www.ohchr.org/EN/HRBodies/CEDAW/Pages/CEDAWIndex.aspx>. Accessed 4 May  
6 2018.
- 7 9. Health Canada. Regulatory decision summary: MIFEGYMISO. Health Canada. 2015.  
8 <http://www.hc-sc.gc.ca/>. Accessed 4 May 2018.
- 9 10. Health Canada. Health Canada Drug Product Database. Health Canada. 2015.  
10 <http://www.hc-sc.gc.ca/dhp-mps/prodpharma/databasdon/index-eng.php>. Accessed 4 May  
11 2018
- 12 11. Jones RK, Henshaw SK. Mifepristone for early medical abortion: experiences in France,  
13 Great Britain and Sweden. *Perspect Sex Reprod Health*. 2002 Jun;34(3):154–61.
- 14 12. Bartlett LA, Berg CJ, Shulman HB, Zane SB, Green CA, Whitehead S, et al. Risk factors  
15 for legal induced abortion-related mortality in the United States. *Obstet Gynecol*. 2004  
16 Apr;103(4):729–37.
- 17 13. Oppegaard KS, Qvigstad E, Fiala C, Heikinheimo O, Benson L, Gemzell-Danielsson K.  
18 Clinical follow-up compared with self-assessment of outcome after medical abortion: a  
19 multicentre, non-inferiority, randomised, controlled trial. *Lancet*. 2015 Feb  
20 21;385(9969):698–704.

- 1  
2  
3 1 14. Løkeland M, Iversen OE, Engeland A, Økland I, Bjørge L. Medical abortion with  
4  
5 2 mifepristone and home administration of misoprostol up to 63 days' gestation. *Acta Obstet*  
6  
7 3 *Gynecol Scand.* 2014 Jul;93(7):647–53.  
8  
9  
10  
11 4 15. Baird B. Medical abortion in Australia: a short history. *Reprod Health Matters.* 2015  
12  
13 5 Nov;23(46):169–76.  
14  
15  
16 6 16. Templeton A, Grimes DA. Clinical practice. A request for abortion. *N Engl J Med.* 2011  
17  
18 7 Dec 8;365(23):2198–204.  
19  
20  
21  
22 8 17. Health Canada. MIFEGYMISO (mifepristone and misoprostol tablets) - Canadian  
23  
24 9 Distribution and Administration Program. Government of Canada. 2017.  
25  
26 10 <http://healthycanadians.gc.ca/recall-alert-rappel-avis/hc-sc/2017/63330a-eng.php>. Accessed  
27  
28 11 4 May 2018  
29  
30  
31  
32 12 18. Canadian Institutes of Health Research. Guide to knowledge translation planning at CIHR:  
33  
34 13 integrated and end-of-grant approaches. Canadian Institutes of Health Research; 2012.  
35  
36 14 <http://www.cihr-irsc.gc.ca/e/45321.html>. Accessed 4 May 2018.  
37  
38  
39  
40 15 19. Greenhalgh T, Robert G, Macfarlane F, Bate P, Kyriakidou O. Diffusion of Innovations in  
41  
42 16 Service Organizations: Systematic Review and Recommendations. *Milbank Quarterly.*  
43  
44 17 2004 Dec 1;82:581–629.  
45  
46  
47  
48 18 20. Pinnock H, Barwick M, Carpenter CR, Eldridge S, Grandes G, Griffiths CJ, et al. Standards  
49  
50 19 for Reporting Implementation Studies (StaRI) Statement. *BMJ.* 2017 Mar 6;356:i6795.  
51  
52  
53  
54 20 21. Rogers EM. *Diffusion of Innovation.* 5th ed. New York, NY, US: Simon Schuster; 2003.  
55  
56  
57  
58  
59

- 1 22. Cook JM, O'Donnell C, Dinnen S, Coyne JC, Ruzek JI, Schnurr PP. Measurement of a  
2 model of implementation for health care: toward a testable theory. *Implement Sci.* 2012 Jul  
3 3;7(1):59.
- 4 23. Godin G, Bélanger-Gravel A, Eccles M, Grimshaw J. Healthcare professionals' intentions  
5 and behaviours: a systematic review of studies based on social cognitive theories.  
6 *Implement Sci.* 2008 Jul 16;3:36.
- 7 24. Ajzen I. The theory of planned behavior. *Organizational Behavior and Human Decision  
8 Processes.* 1991 Dec 1;50(2):179–211.
- 9 25. Triandis HC. Values, attitudes, and interpersonal behavior. *Nebraska Symposium on  
10 Motivation.* 1979;27:195–259.
- 11 26. Aiyer AN, Ruiz G, Steinman A, Ho GYF. Influence of physician attitudes on willingness to  
12 perform abortion. *Obstetrics & Gynecology.* 1999 Apr 1;93(4):576–80.
- 13 27. World Health Organization. WHO Model List of Essential Medicine [Internet]. 2017 Mar.  
14 Report No.: 20th edition.  
15 <http://www.who.int/medicines/publications/essentialmedicines/en/>. Accessed 4 May 2018.
- 16 28. Kulier R, Gülmezoglu AM, Hofmeyr GJ, Cheng LN, Campana A. Medical methods for first  
17 trimester abortion. *Cochrane Database Syst Rev.* 2004;(2):CD002855.
- 18 29. Kapp N, Whyte P, Tang J, Jackson E, Brahmi D. A review of evidence for safe abortion  
19 care. *Contraception.* 2013 Sep;88(3):350–63.
- 20 30. Barnard S, Kim C, Park MH, Ngo TD. Doctors or mid-level providers for abortion.  
21 *Cochrane Database Syst Rev.* 2015 Jul 27;(7):CD011242.

- 1  
2  
3 1 31. Finer L, Fine JB. Abortion Law Around the World: Progress and Pushback. *Am J Public*  
4  
5 2 Health. 2013 Apr;103(4):585–9.  
6  
7  
8 3 32. Mifeprex REMS Study Group. Sixteen Years of Overregulation: Time to Unburden  
9  
10 4 Mifeprex. *New England Journal of Medicine*. 2017 Feb 23;376(8):790–4.  
11  
12  
13 5 33. Grossman D, Goldstone P. Mifepristone by prescription: a dream in the United States but  
14  
15 6 reality in Australia. *Contraception*. 2015 Sep;92(3):186–9.  
16  
17  
18 7 34. White K, Carroll E, Grossman D. Complications from first-trimester aspiration abortion: a  
19  
20 8 systematic review of the literature. *Contraception*. 2015 Nov;92(5):422–38.  
21  
22  
23 9 35. Winikoff B, Westhoff C. Fifteen years: looking back and looking forward. *Contraception*.  
24  
25 10 2015 Sep;92(3):177–8.  
26  
27  
28 11 36. Kopp Kallner H, Gomperts R, Salomonsson E, Johansson M, Marions L, Gemzell-  
29  
30 12 Danielsson K. The efficacy, safety and acceptability of medical termination of pregnancy  
31  
32 13 provided by standard care by doctors or by nurse-midwives: a randomised controlled  
33  
34 14 equivalence trial. *BJOG*. 2015 Mar;122(4):510–7.  
35  
36  
37 15 37. Wenger E, McDermott R, Snyder WM. *Cultivating communities of practice*. Boston:  
38  
39 16 Harvard Business School Publishing; 2002.  
40  
41  
42 17 38. Li LC, Grimshaw JM, Nielsen C, Judd M, Coyte PC, Graham ID. Evolution of Wenger's  
43  
44 18 concept of community of practice. *Implement Sci*. 2009 Mar 1;4:11.  
45  
46  
47 19 39. Newton D, Bayly C, McNamee K, Bismark M, Hardiman A, Webster A, et al. '...a one  
48  
49 20 stop shop in their own community': Medical abortion and the role of general practice. *Aust*  
50  
51  
52 21 *N Z J Obstet Gynaecol*. 2016 Jul 1;n/a-n/a.  
53  
54  
55  
56  
57  
58  
59

- 1  
2  
3 1 40. Devane C, Renner R, Munro S, Norman WV. Implementation of Mifepristone in Canadian  
4  
5 2 Medical Abortion Care: Pilot and Feasibility Testing of a Survey to Assess Facilitators and  
6  
7 3 Barriers. Vancouver, BC: Contraception and Abortion Team; 2017 Oct.  
8  
9  
10  
11 4 41. Kothari A, Armstrong R. Community-based knowledge translation: unexplored  
12  
13 5 opportunities. *Implement Sci.* 2011 Jun 6;6(1):59.  
14  
15  
16 6 42. Harrison MB, Légaré F, Graham ID, Fervers B. Adapting clinical practice guidelines to  
17  
18 7 local context and assessing barriers to their use. *CMAJ.* 2010 Feb 9;182(2):E78–84.  
19  
20  
21  
22 8 43. Harrison MB, Graham ID. Roadmap for a participatory research-practice partnership to  
23  
24 9 implement evidence. *Worldviews Evid Based Nurs.* 2012 Dec;9(4):210–20.  
25  
26  
27  
28 10 44. Gagliardi AR, Berta W, Kothari A, Boyko J, Urquhart R. Integrated knowledge translation  
29  
30 11 (IKT) in health care: a scoping review. *Implement Sci.* 2016;11:38.  
31  
32  
33 12 45. Graham ID, Kothari A, McCutcheon C. Moving knowledge into action for more effective  
34  
35 13 practice, programmes and policy: protocol for a research programme on integrated  
36  
37 14 knowledge translation. *Implement Sci.* 2018 Feb 2;13:22.  
38  
39  
40  
41 15 46. Statistics Canada. Access to a regular medical doctor, 2014. Government of Canada. 2015.  
42  
43 16 <https://www.statcan.gc.ca/pub/82-625-x/2015001/article/14177-eng.htm>. Accessed 4 May  
44  
45 17 2018.  
46  
47  
48  
49 18 47. Norman WV, Guilbert E, Okpaleke C, Lichtenberg ES, Paul M, O'Connell White K, et al.  
50  
51 19 Abortion services in Canada: results of the 2012 national survey. *Contraception.* 2014 Sep  
52  
53 20 1;90(3):300.  
54  
55  
56  
57  
58  
59

- 1  
2  
3 1 48. Guilbert ER, Hayden AS, Jones HE, White KO, Lichtenberg ES, Paul M, et al. First-  
4  
5 2 trimester medical abortion practices in Canada: National survey. *Canadian Family*  
6  
7 3 *Physician*. 2016 Apr 1;62(4):e201–8.
- 8  
9  
10  
11 4 49. Norman WV, Soon JA, Maughn N, Dressler J. Barriers to rural induced abortion services in  
12  
13 5 Canada: findings of the British Columbia Abortion Providers Survey (BCAPS). *PLoS*  
14  
15 6 *ONE*. 2013;8(6):e67023.
- 16  
17  
18  
19 7 50. Dressler J, Maughn N, Soon JA, Norman WV. The perspective of rural physicians  
20  
21 8 providing abortion in Canada: qualitative findings of the BC Abortion Providers Survey  
22  
23 9 (BCAPS). *PLoS ONE*. 2013;8(6):e67070.
- 24  
25  
26  
27 10 51. Légaré F, Borduas F, Freitas A, Jacques A, Godin G, Luconi F, et al. Development of a  
28  
29 11 Simple 12-Item Theory-Based Instrument to Assess the Impact of Continuing Professional  
30  
31 12 Development on Clinical Behavioral Intentions. *PLoS One* [Internet]. 2014 Mar 18;9(3).  
32  
33 13 <https://www.ncbi.nlm.nih.gov/pmc/articles/PMC3958345/>
- 34  
35  
36  
37 14 52. Guilbert ER, Morin D, Guilbert AC, Gagnon H, Robitaille J, Richardson M. Task-shifting  
38  
39 15 in the delivery of hormonal contraceptive methods: Validation of a questionnaire and  
40  
41 16 preliminary results. *International Journal of Nursing Practice*. 2011 Jun 1;17(3):315–21.
- 42  
43  
44  
45 17 53. Hulme J, Dunn S, Guilbert E, Soon JA, Norman WV. Barriers and facilitators to family  
46  
47 18 planning access in Canada: Stakeholder input on implications for health system and policy  
48  
49 19 reform. *Healthcare Policy*. 2015 Feb;10(3):48–63.
- 50  
51  
52  
53  
54  
55  
56  
57  
58  
59  
60

- 1  
2  
3 1 54. Saunders B, Sim J, Kingstone T, Baker S, Waterfield J, Bartlam B, et al. Saturation in  
4  
5 2 qualitative research: exploring its conceptualization and operationalization. *Qual Quant*.  
6  
7 3 2017 Sep 14;1–15.  
8  
9  
10  
11 4 55. Sandelowski M. Sample size in qualitative research. *Research in Nursing & Health*. 1995  
12  
13 5 Apr 1;18(2):179–83.  
14  
15  
16 6 56. Albrecht L, Archibald M, Arseneau D, Scott SD. Development of a checklist to assess the  
17  
18 7 quality of reporting of knowledge translation interventions using the Workgroup for  
19  
20 8 Intervention Development and Evaluation Research (WIDER) recommendations.  
21  
22 9 *Implement Sci*. 2013 May 16;8:52.  
23  
24  
25  
26 10 57. Guilbert ER, Robitaille J, Guilbert AC, Morin D. Determinants of the implementation of a  
27  
28 11 new practice in hormonal contraception by Quebec nurses. *The Canadian Journal of Human*  
29  
30 12 *Sexuality*. 2014 Jan 1. <https://www.utpjournals.press/doi/abs/10.3138/cjhs.23.1-A1>.  
31  
32 13 Accessed 4 May 2018  
33  
34  
35  
36 14 58. Morse J, Neihaus L, Wolfe R, Wilkins S. The role of the theoretical drive in maintaining  
37  
38 15 validity in mixed-methods research. *Qualitative Research in Psychology*. 2006;3(4):279-91.  
39  
40  
41  
42 16 59. Braun V, Clarke V. Using thematic analysis in psychology. *Qualitative Research in*  
43  
44 17 *Psychology*. 2006 Jan 1;3(2):77–101.  
45  
46  
47  
48 18 60. Panel on Return on Investment in Health Research. Making an impact: a preferred  
49  
50 19 framework and indicators to measure returns on investment in health research. *Canadian*  
51  
52 20 *Academy of Health Sciences*; 2009.

- 1  
2  
3 1 61. University of British Columbia. Contraception and Abortion Research Team - Groupe de  
4 recherche su l'avortement et al contraception (CART-GRAC). Team and Network. 2017.  
5  
6 2  
7  
8 3  
9  
10  
11 4 62. Norman WV, Shoveller JA, Kaczorowski J. Contraception and Abortion in BC: Experience  
12 guiding research guiding care. Richmond, BC; 2011 Apr. [http://med-fom-cart-](http://med-fom-cart-grac.sites.olt.ubc.ca/files/2015/08/CART2011ProceedingsFinal.pdf)  
13  
14 5  
15 6  
16 6  
17  
18

### 19 **AUTHORS' CONTRIBUTIONS**

20  
21 8 WVN, EG and SD developed the study concept and approach with input from all co-authors.  
22  
23  
24 9 WVN wrote the first draft of the manuscript. SM significantly contributed to the design of iKT  
25  
26 10 approach and qualitative interviews, and led all manuscript revisions. EG, SD and RR  
27  
28 11 significantly contributed to the survey design and WVN, SD and EG to the structure and content  
29  
30 12 of the Community of Practice platform. TK contributed to the design of the iKT approach. JAS  
31  
32 13 led the design of the pharmacist recruitment and data collection. MB, CD, RR, AW and MSW  
33  
34 14 contributed to study design and practitioner support elements. All authors contributed to  
35  
36 15 manuscript revisions and reviewed and approved the final manuscript.  
37  
38  
39  
40  
41  
42  
43

### 44 **FUNDING STATEMENT**

45  
46 18 This study is supported by the Canadian Institutes of Health Research Partnership for Health  
47  
48 19 System Improvement Grant (PHE148161), in partnership with Michael Smith Foundation for  
49  
50 20 Health Research (Award #16743). Dr. Norman is supported as a Scholar of the Michael Smith  
51  
52 21 Foundation for Health Research (2012-5139(HSR)), and as an Applied Public Health Research  
53  
54 22 Chair by the Canadian Institutes of Health Research (CPP-329455-107837). In kind support will  
55  
56  
57  
58  
59



1 be contributed by the Society of Obstetricians and Gynecologists of Canada, the College of  
2  
3  
4  
5  
6 2 Family Physicians of Canada, the Canadian Pharmacists Association, and the Women's Health  
7  
8 3 Research Institute of British Columbia Women's Hospital and Health Centre of the Provincial  
9  
10 4 Health Services Authority of British Columbia. The SOGC supported development and design of  
11  
12  
13 5 the Community of Practice Platform through a contract with the lead author's institution.  
14  
15  
16 6

17  
18 7 **COMPETING INTERESTS STATEMENT**

19  
20 8 The authors declare that they have no competing interests.  
21  
22  
23 9

24  
25 10 **WORD COUNT: 4914**  
26  
27  
28  
29  
30  
31  
32  
33  
34  
35  
36  
37  
38  
39  
40  
41  
42  
43  
44  
45  
46  
47  
48  
49  
50  
51  
52  
53  
54  
55  
56  
57  
58  
59  
60

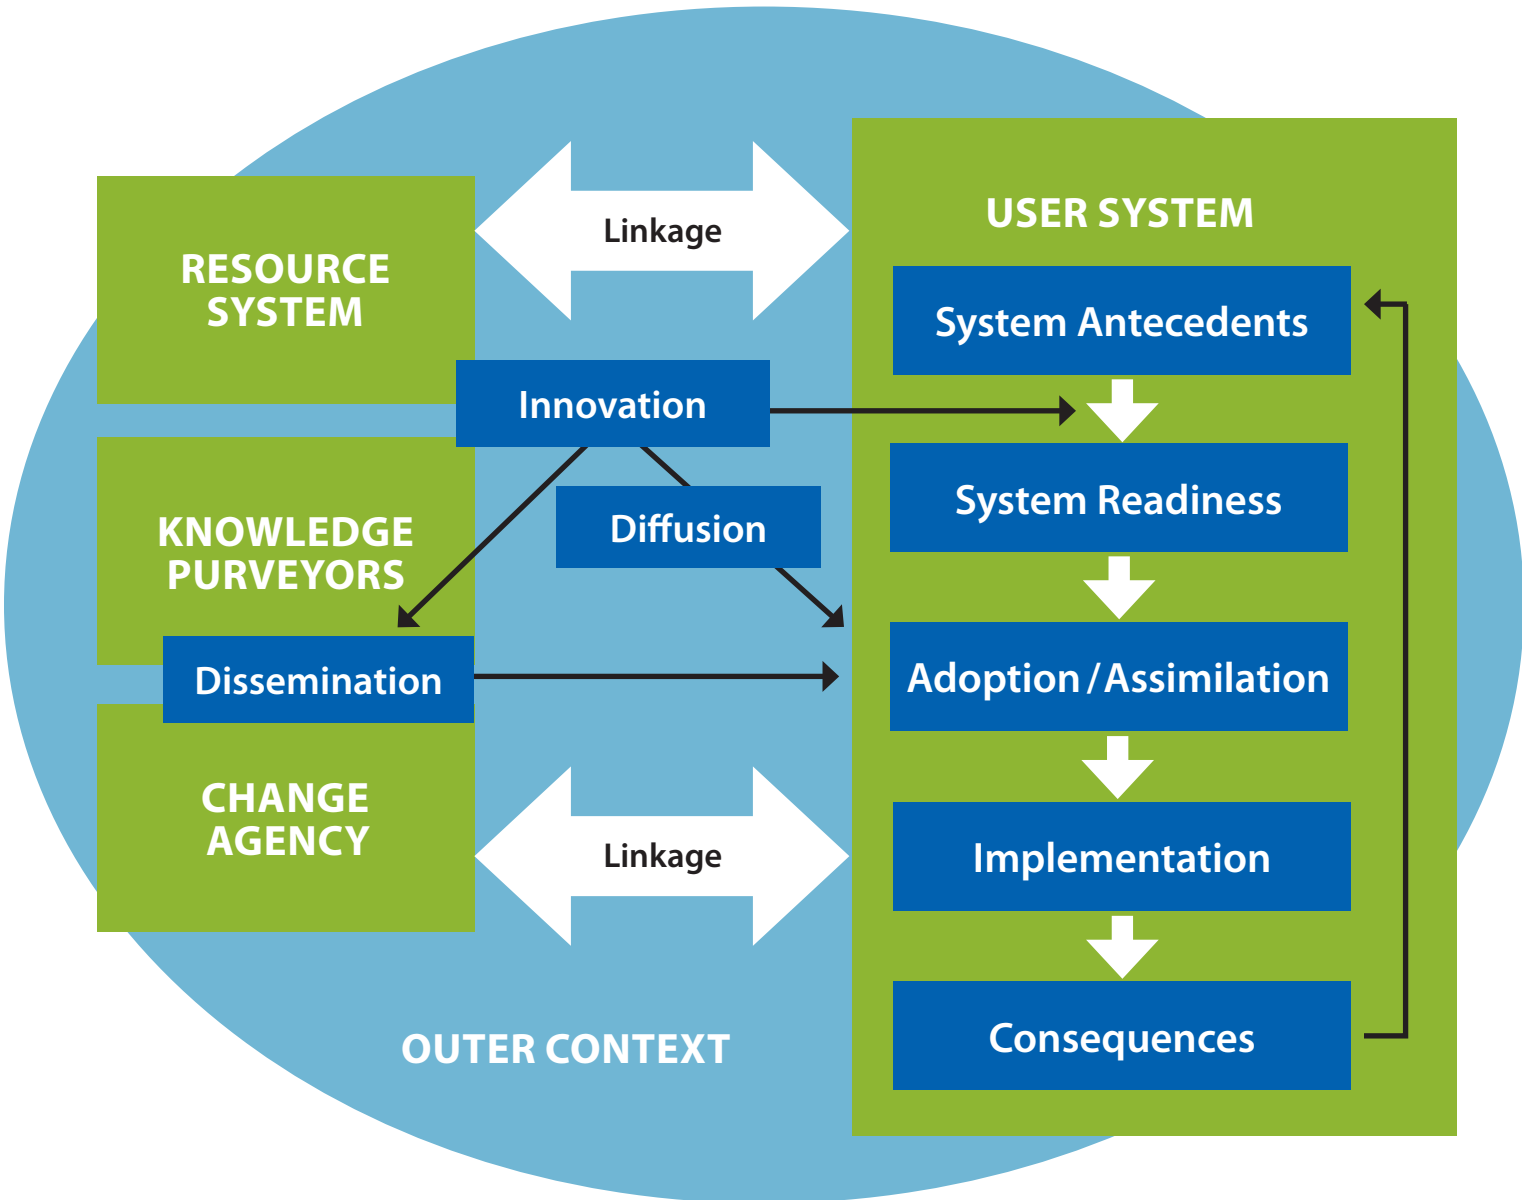

A Conceptual Model of Diffusion of Innovations in Health Service Delivery and Organizations, adapted from Greenhalgh et al. (2004)

1  
2  
3  
4  
5  
6  
7  
8  
9  
10  
11  
12  
13  
14  
15  
16  
17  
18  
19  
20  
21  
22  
23  
24  
25  
26  
27  
28  
29  
30  
31  
32  
33  
34  
35  
36  
37  
38  
39  
40  
41  
42  
43  
44  
45  
46  
47

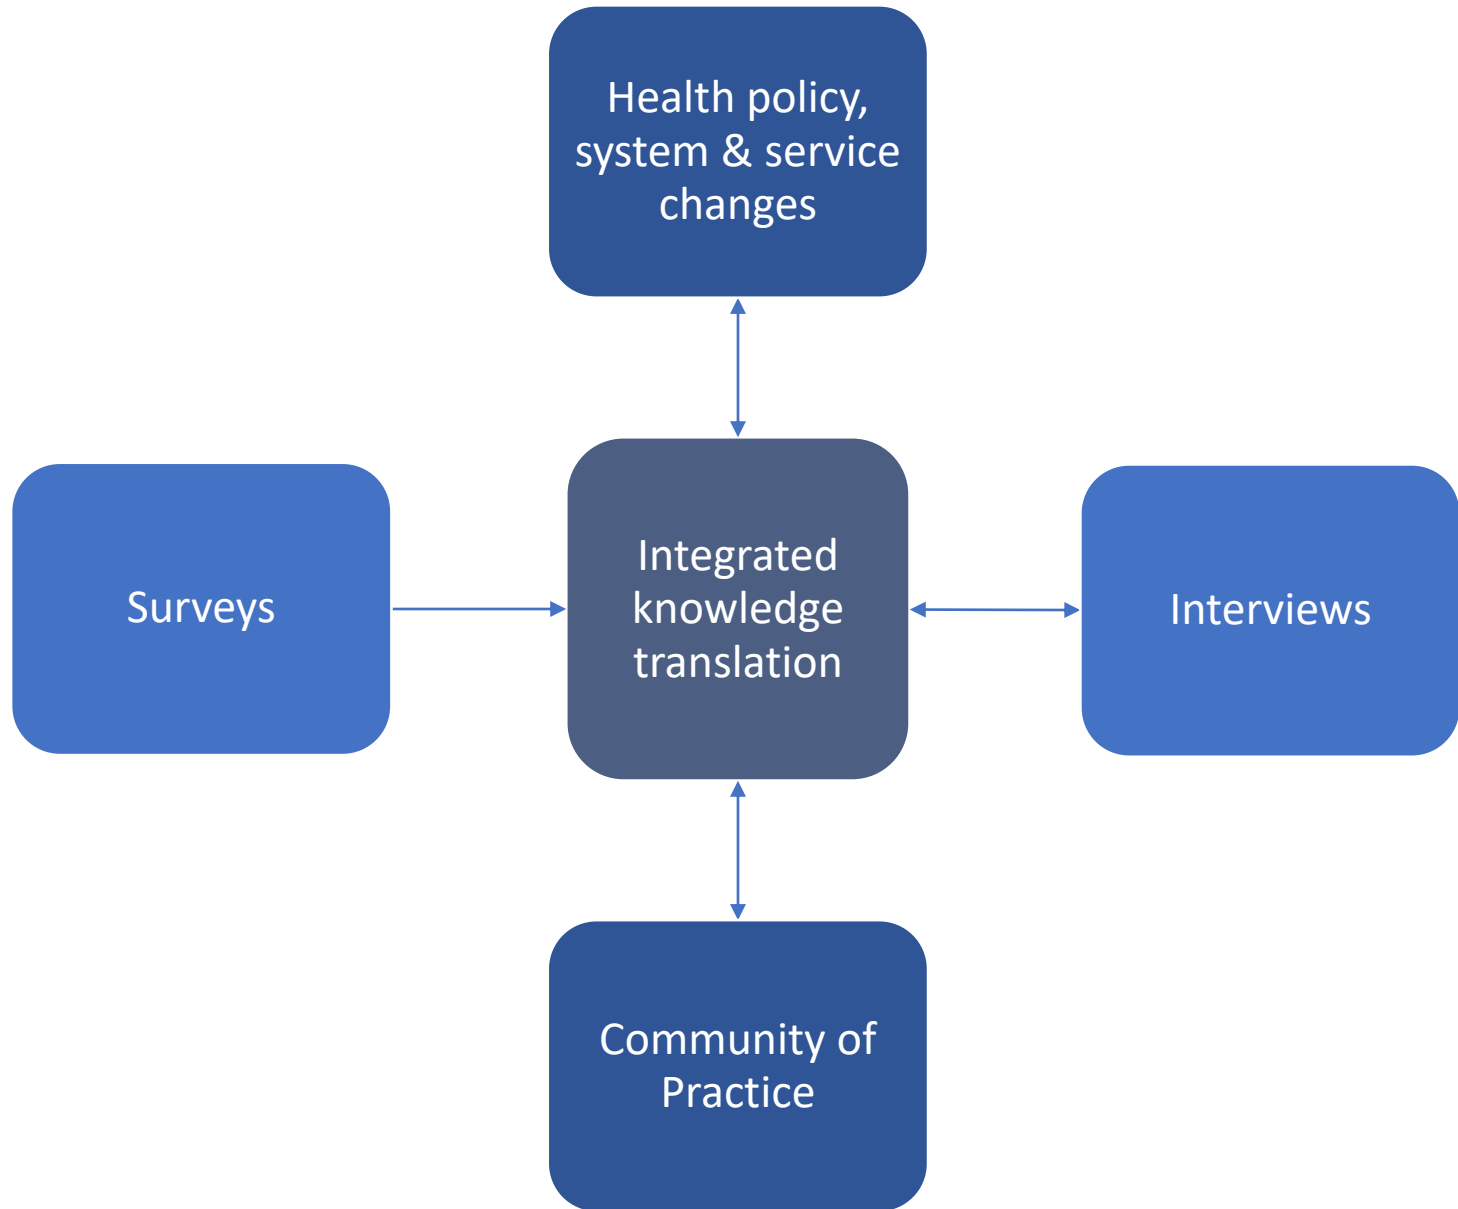

1  
2  
3  
4  
5  
6  
7  
8  
9  
10  
11  
12  
13  
14  
15  
16  
17  
18  
19  
20  
21  
22  
23  
24  
25  
26  
27  
28  
29  
30  
31  
32  
33  
34  
35  
36  
37  
38  
39  
40  
41
