# Supplementary material for: Could implementation of mifepristone address Canada’s urban–rural abortion access disparity: a mixed-methods implementation study protocol
Source: PubMed Central journal article supplement — BMJ Open. 2019 Apr 20;9(4):e028443. doi: 10.1136/bmjopen-2018-028443 (PMC6500320; doi:10.1136/bmjopen-2018-028443), 2019-04-20
Supplement: bmjopen-2018-028443.reviewer_comments.pdf [file bmjopen-2018-028443.reviewer_comments.pdf]

## PEER REVIEW HISTORY

BMJ Open publishes all reviews undertaken for accepted manuscripts. Reviewers are asked to complete a checklist review form (<http://bmjopen.bmj.com/site/about/resources/checklist.pdf>) and are provided with free text boxes to elaborate on their assessment. These free text comments are reproduced below.

## ARTICLE DETAILS

|                            |                                                                                                                                                                                          |
|----------------------------|------------------------------------------------------------------------------------------------------------------------------------------------------------------------------------------|
| <b>TITLE (PROVISIONAL)</b> | Could implementation of mifepristone address Canada's urban-rural abortion access disparity? A mixed methods implementation study protocol                                               |
| <b>AUTHORS</b>             | Norman, Wendy V.; Munro, Sarah; Brooks, Melissa; Devane, Courtney; Guilbert, Edith; Renner, Regina; Kendall, Tamil; Soon, Judith; Waddington, Ashley; Wagner, Marie-Soleil; Dunn, Sheila |

This article was not externally reviewed at BMJ Open. Protocols that have been independently assessed prior to submission to BMJ Open are usually fast-tracked to publication on the grounds that further substantial changes will not be possible. This independent assessment will usually be external, independent review for both a substantial grant award from a non-commercial or government funder and ethics approval.
